# Supplementary material for: Niobium- and zirconium-catalyzed reactions of substituted 2 alkynylamines with Et2Zn
Source: Royal Society of Chemistry journal article supplement (doi:10.1039/d0ra10132j), 2021-01-01

\*Rita N. Kadikova, Ilfir R. Ramazanov, Azat M. Gabdullin, Oleg S. Mozgovoj, Usein M.  
Dzhemilev

Niobium- and zirconium-catalyzed reactions of substituted 2-alkynylamines with  
Et<sub>2</sub>Zn

*Institute of Petrochemistry and Catalysis of Russian Academy of Sciences, 141 Prospekt  
Oktyabrya, Ufa 450075, Russian Federation*

*Tel./fax: +7-347-284-2750*

*E-mail address: [kadikritan@gmail.com](mailto:kadikritan@gmail.com)*

## Supporting information

### Reagents and methods

#### General information

The reagents were obtained from Sigma-Aldrich or Acros. Hexane were distilled over P<sub>2</sub>O<sub>5</sub>. Diethyl ether, benzene and 1,2-dimethoxyethane were dried over sodium. 2-Alkynylamines **1b,d,f** were prepared by aminomethylation of terminal alkynes by bisamine [1]. Alkynylamines **1a,e,c,g** were prepared by aminomethylation of terminal alkynes with aqueous formaldehyde and secondary amines under CuI catalysis [2]. Nuclear magnetic resonance spectroscopy was performed on a Bruker Avance 500. The <sup>1</sup>H NMR spectra were recorded at 500 MHz and <sup>13</sup>C-<sup>1</sup>H NMR spectra at 100 MHz in CDCl<sub>3</sub>. The chemical shifts are reported in ppm relative to tetramethylsilane (TMS) as the internal standard. The numbering of atoms in the <sup>13</sup>C-<sup>1</sup>H and <sup>1</sup>H NMR spectra of the compounds **2a-g**, **3b,e**, **5a-d**, **6d**, **7b** is shown in Figures 1,2. Elemental analysis was performed using a Carlo-Erba CHN 1106 elemental analyser. Mass spectra were obtained on a Finnigan 4021 instrument. The yields were calculated from the isolated amount of allylamines obtained from starting 2-alkynylamines.

Preparation of allylamines **2a-g**, **3e,b** via Nb-Mg-catalyzed reaction of substituted propargylamines with Et<sub>2</sub>Zn.

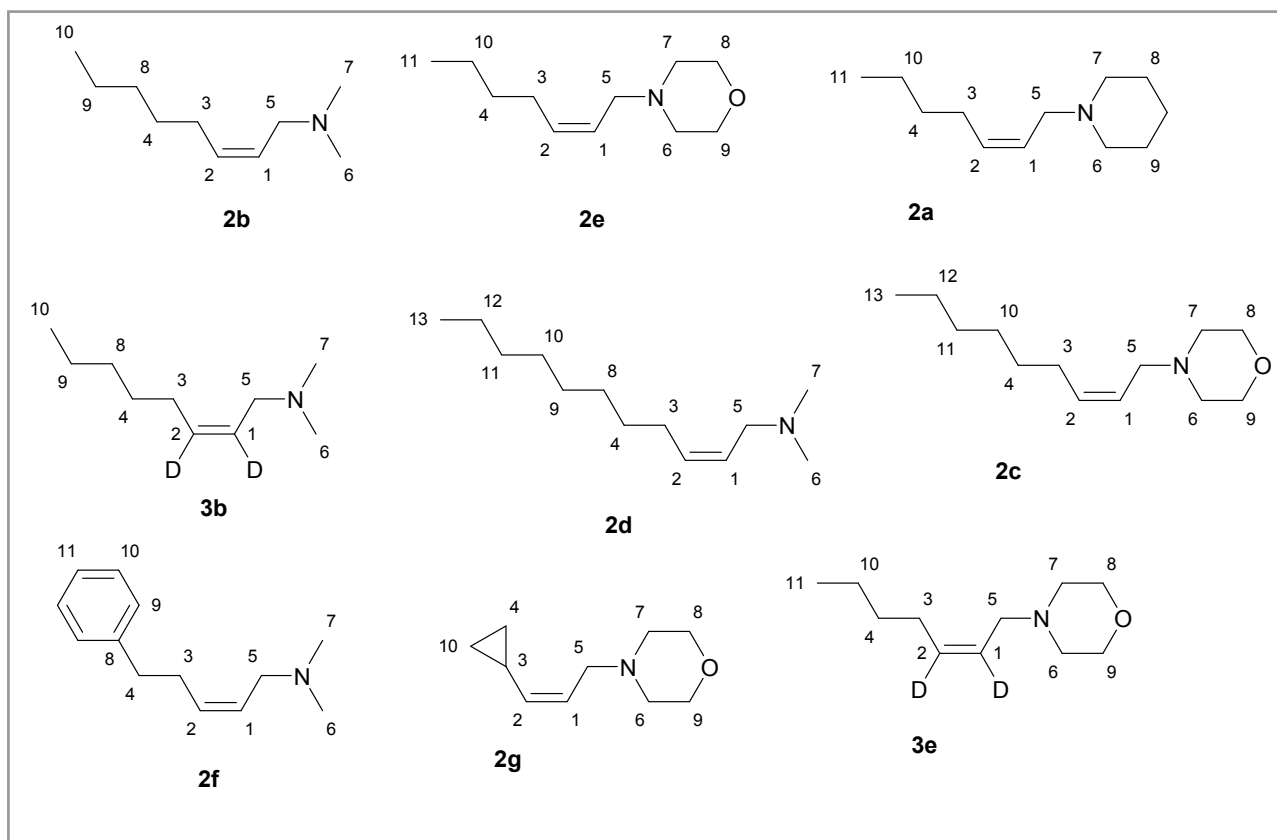

**Figure 1.** The numbering of atoms in the  $^{13}\text{C}$ - and  $^1\text{H}$ -NMR spectra of the compounds **2a-g**, **3b,e**.

(*Z*)-*N,N*-dimethyloct-2-en-1-amine; Typical Procedure.

To a solution of *N,N*-dimethyloct-2-yn-1-amine (306 mg, 2 mmol) and  $\text{Et}_2\text{Zn}$  (1 M in hexanes, 8 mL, 8 mmol) in  $\text{Et}_2\text{O}$  (6 mL) was added  $\text{NbCl}_5$  (0.081g, 0.30 mmol). Ethylmagnesium bromide (1.4 M in  $\text{Et}_2\text{O}$ , 0.428 mL, 0.6 mmol) was then added and the reaction mixture rapidly turned black. After 18 h at 40 °C, the reaction mixture was diluted with  $\text{Et}_2\text{O}$  (5 mL), and 25 wt% KOH solution (3 mL) was added dropwise while the reaction flask was cooled in an ice bath. The aqueous layer was extracted with diethyl ether (3×10 mL). The combined organic layers were washed with brine (20 mL), dried over anhydrous  $\text{MgSO}_4$ . The reaction mixture was filtered through a filter paper and concentrated in vacuo to give crude product as a yellow oil. The residue was distilled through a micro column at 20 mmHg to give **2b** (248 mg, 80%) as a colourless oil. b.p. 77 – 79 °C (20 mmHg).

$^1\text{H}$  NMR (500MHz,  $\text{CDCl}_3$ ):  $\delta$  = 0.91 (s, 3H, C(10) $\text{H}_3$ ), 1.31 (s, 4H, C(9,8) $\text{H}_2$ ), 1.36 – 1.41 (m, 2H, C(4) $\text{H}_2$ ), 2.05 – 2.09 (m, 2H, C(3) $\text{H}_2$ ), 2.25 (s, 6H, C(6,7) $\text{H}_3$ ), 2.95 (d,  $J$  = 6 Hz, 2H, C(5) $\text{H}_2$ ), 5.44 – 5.49 (m, 1H, C(1)H), 5.53 – 5.61 (m, 1H, C(2)H).

$^{13}\text{C}$  NMR (500MHz,  $\text{CDCl}_3$ ):  $\delta$  = 14.04 (C(10)), 22.54 (C(9)), 27.43 (C(3)), 29.24 (C(4)), 31.48 (C(8)), 45.22 (C(6,7)), 56.13 (C(5)), 126.59 ((C(1)), 132.97 (C(2)).

MS (EI):  $m/z$ , % = 155 (18) [ $\text{M}^+$ ], 98 (29), 84 (53), 58 (89), 45 (100).

Anal. calcd for  $\text{C}_{10}\text{H}_{21}\text{N}$ , (%): C, 77.35; H, 13.63; N, 9.02. Found, %: C, 77.58; H, 13.58; N, 8.71.

### **(Z)-1-(hept-2-en-1-yl)piperidine (2a)**

Using the procedure described above 358 mg of *1-(hept-2-yn-1-yl)piperidine* (2 mmol) gave crude product that was distilled through a micro column at 3,4 mmHg to afford **2a** (239 mg, 66%) as a colourless oil. b.p. 107 – 110 °C (3,4 mmHg).

<sup>1</sup>H NMR (500MHz, CDCl<sub>3</sub>): δ = 0.88 (t, *J* = 7 Hz, 3H, C(11)H<sub>3</sub>), 1.31 (s, 4H, C(4,10)H<sub>2</sub>), 1.41 (m, 2H, C(12)H<sub>2</sub>), 1.55 – 1.59 (m, 4H, C(8,9)H<sub>2</sub>), 2.03 (q, *J* = 6 Hz, 2H, C(3)H<sub>2</sub>), 2.36 (s, 4H, C(6,7)H<sub>2</sub>), 2.95 (d, *J* = 6 Hz, 2H, C(5)H<sub>2</sub>), 5.43 – 5.53 (m, 1H, C(1,2)H).

<sup>13</sup>C NMR (500MHz, CDCl<sub>3</sub>): δ = 13.93 (C(11)), 22.68 (C(10)), 24.37 (C(12)), 25.99 (C(8,9)), 27.16 (C(3)), 31.73 (C(4)), 54.51 (C(6,7)), 55.88 (C(5)), 126.43 (C(1)), 132.71 (C(2)).

MS (EI): *m/z*, % = 181 (7) [M<sup>+</sup>], 138 (4), 124 (10), 98 (29), 84 (100), 55 (30), 41 (15).

Anal. calcd for C<sub>12</sub>H<sub>23</sub>N, (%): C, 79.49; H, 12.79; N, 7.72; Found, %: C, 79.45; H, 12.92; N, 7.52.

### **(Z)-4-(non-2-en-1-yl)morpholine (2c)**

Using the procedure described above 418 mg of *4-(non-2-yn-1-yl)morpholine* (2 mmol) gave crude product that was distilled through a micro column at 2,4 mmHg to afford **2c** (308 mg, 73%) as a colourless oil. b.p. 127 – 129 °C (2,4 mmHg).

<sup>1</sup>H NMR (500MHz, CDCl<sub>3</sub>): δ = 0.83 (t, *J* = 6 Hz, 3H, C(13)H<sub>3</sub>), 1.22 – 1.25 (m, 6H, C(10 - 12)H<sub>2</sub>), 1.26 – 1.30 (m, 2H, C(4)H<sub>2</sub>), 1.98 – 2.02 (q, *J* = 7 Hz, 2H, C(3)H<sub>2</sub>), 2.39 (s, 4H, C(6,7)H<sub>2</sub>), 2.94 (d, *J* = 7 Hz, 2H, C(5)H<sub>2</sub>), 3.64 – 3.66 (m, 4H, C(8,9)H<sub>2</sub>), 5.36 – 5.40 (m, 1H, C(1)H), 5.49 – 5.53 (m, 1H, C(2)H).

<sup>13</sup>C NMR (500MHz, CDCl<sub>3</sub>): δ = 13.99 (C(13)), 22.55 (C(12)), 27.45 (C(3)), 28.87 (C(10)), 29.43 (C(4)), 31.65 (C(11)), 55.43 (C(5)), 53.59 (C(6,7)), 66.94 (C(8,9)), 125.33 (C(1)), 133.67 (C(2)).

MS (EI): *m/z*, % = 211 (3) [M<sup>+</sup>], 126 (5), 87 (100), 86 (40), 57 (30), 40 (15).

Anal. calcd for C<sub>13</sub>H<sub>25</sub>NO, (%): C, 73.88; H, 11.92; N, 6.63; Found, %: C, 74.03; H, 12.08; N, 6.77.

### **(Z)-N,N-dimethylundec-2-en-1-amine (2d)**

Using the procedure described above 390 mg of *N,N-dimethylundec-2-yn-1-amine* (2 mmol) gave crude product that was distilled through a micro column at 5 mmHg to afford **2d** (351 mg, 89%) as a colourless oil. b.p. 107 – 109 °C (5 mmHg).

<sup>1</sup>H NMR (500MHz, CDCl<sub>3</sub>): δ = 0.90 (t, *J* = 7 Hz, 3H, C(13)H<sub>3</sub>), 1.29 (s, 8H, C(9 - 12)H<sub>2</sub>), 1.35 – 1.38 (m, 4H, C(4,8)H<sub>2</sub>), 2.04 – 2.09 (m, 2H, C(3)H<sub>2</sub>), 2.25 (s, 6H,

C(6,7)H<sub>3</sub>), 2.95 (d,  $J = 6$  Hz, 2H, C(5)H<sub>2</sub>), 5.44 – 5.49 (m, 1H, C(1)H), 5.52 – 5.57 (m, 1H, C(2)H).

<sup>13</sup>C NMR (500MHz, CDCl<sub>3</sub>):  $\delta = 14.11$  (C(13)), 22.68 (C(12)), 27.47 (C(3)), 29.29 (C(9, 10)), 29.49 (C(8)), 29.57 (C(4)), 31.89 (C(11)), 45.26 (C(6,7)), 56.16 (C(5)), 126.66 (C(1)), 132.93 (C(2)).

MS (EI):  $m/z$ , % = 197 (9) [M<sup>+</sup>], 110 (4), 98 (24), 84 (52), 58 (89), 45 (100).

Anal. calcd for C<sub>13</sub>H<sub>27</sub>N, (%): C, 79.11; H, 13.79; N, 7.10; Found, %: C, 79.16; H, 13.65; N, 6.95.

### **(Z)-4-(hept-2-en-1-yl)morpholine (2e)**

Using the procedure described above 362 mg of 4-(hept-2-yn-1-yl)morpholine (2 mmol) gave crude product that was distilled through a micro column at 5 mmHg to afford **2e** (275 mg, 75%) as a colourless oil. b.p. 110 – 112 °C (5 mmHg).

<sup>1</sup>H NMR (500MHz, CDCl<sub>3</sub>):  $\delta = 0.89$  (s, 3H, C(11)H<sub>3</sub>), 1.21 – 1.25 (m, 4H, C(4, 10)H<sub>2</sub>), 2.04– 2.07 (m, 2H, C(3)H<sub>2</sub>), 2.45 (s, 4H, C(6,7)H<sub>2</sub>), 3.01 (d,  $J = 6$  Hz, 2H, C(5)H<sub>2</sub>), 3.72 (s, 4H, C(8,9)H<sub>2</sub>), 5.42 – 5.46 (m, 1H, C(1)H), 5.55 – 5.59 (m, 1H, C(2)H).

<sup>13</sup>C NMR (500MHz, CDCl<sub>3</sub>):  $\delta = 13.94$  (C(11)), 22.29 (C(10)), 27.20 (C(3)), 31.68 (C(4)), 53.46 (C(5)), 53.59 (C(6,7)), 66.98 (C(8,9)), 125.26 (C(1)), 133.79 (C(2)).

MS (EI):  $m/z$ , % = 183 (10) [M<sup>+</sup>], 140 (4), 110 (28), 87 (100), 57 (70), 41 (21).

Anal. calcd for C<sub>11</sub>H<sub>21</sub>NO, (%): C, 72.08; H, 11.55; N, 7.64; Found, %: C, 72.22; H, 11.56; N, 7.37.

### **(Z)-N,N-dimethyl-5-phenylpent-2-en-1-amine (2f)**

Using the procedure described above 374 mg of N,N-dimethyl-5-phenylpent-2-yn-1-amine (2 mmol) gave crude product that was distilled through a micro column at 2,2 mmHg to afford **2f** (242 mg, 64%) as a colourless oil. b.p. 118 – 120 °C (2,2 mmHg).

<sup>1</sup>H NMR (500MHz, CDCl<sub>3</sub>):  $\delta = 2.24$  (s, 6H, C(6,7)H<sub>3</sub>), 2.43 (q,  $J = 7$  Hz, 2H, C(3)H<sub>2</sub>), 2.71 (t,  $J = 7$  Hz, 2H, C(4)), 2.94 (s, 2H, C(5)H<sub>2</sub>), 5.51 – 5.55 (m, 1H, C(1)H), 5.59 – 5.64 (m, 1H, C(2)H), 7.30 (t,  $J = 7$  Hz, 2H, C(9)H), 7.21 (d,  $J = 7$  Hz, 3H, C(10,11)H).

<sup>13</sup>C NMR (500MHz, CDCl<sub>3</sub>):  $\delta = 29.46$  (C(3)), 35.80 (C(4)), 45.01 (C(6,7)), 55.93 (C(5)), 125.89 (C(11)), 127.38 (C(1)), 128.33 (C(9)), 128.49 (C(10)), 131.73 (C(2)), 141.74 (C(8)).

MS (EI):  $m/z$ , % = 189 (16) [M<sup>+</sup>], 144 (11), 143 (11), 129 (59), 98 (45), 91 (64), 58 (100), 45 (90).

Anal. calcd for C<sub>13</sub>H<sub>19</sub>N, (%): C, 82.48; H, 10.12; N, 7.40; Found, %: C, 82.44; H, 9.97; N, 7.27.

### **(Z)-4-(3-cyclopropylallyl)morpholine (2g)**

Using the procedure described above 330 mg of 4-(3-cyclopropylprop-2-yn-1-yl)morpholine (2 mmol) gave crude product that was distilled through a micro column at 4 mmHg to afford **2g** (230 mg, 69%) as a colourless oil. b.p. 90 – 92 °C (4 mmHg).

<sup>1</sup>H NMR (500MHz, CDCl<sub>3</sub>): δ = 0.26 – 0.28 (m, 2H (A), C(4,10)H<sub>2</sub>), 0.68 – 0.71 (m, 2H (B), C(4,10)H<sub>2</sub>), 1.26 – 1.30 (m, 2H, C(4)H<sub>2</sub>), 1.49 – 1.57 (m, 1H, C(3)H), 2.44 (s, 4H, C(6,7)H<sub>2</sub>), 3.08 (d, *J* = 7 Hz, 2H, C(5)H<sub>2</sub>), 3.66 – 3.67 (m, 4H, C(8,9)H<sub>2</sub>), 5.29 – 5.34 (m, 1H, C(1)H), 4.87 (t, *J* = 10 Hz, 1H, C(2)H).

<sup>13</sup>C NMR (500MHz, CDCl<sub>3</sub>): δ = 6.46 (C(4,10)), 9.76 (C(3)), 53.61 (C(6,7)), 55.84 (C(5)), 66.98 (C(8,9)), 123.39 (C(1)), 137.76 (C(2)).

MS (EI): *m/z*, % = 167 (10) [M<sup>+</sup>], 138 (33), 87 (70), 79 (87), 56 (69), 40 (100).

Anal. calcd for C<sub>10</sub>H<sub>17</sub>NO, (%): C, 71.81; H, 10.25; N, 8.37; Found, %: C, 71.98; H, 10.35; N, 8.35.

### **(Z)-N,N-dimethyloct-2-en-1-amine-2,3-d<sub>2</sub> (3b)**

Using the procedure described above 306 mg of *N,N*-dimethyloct-2-yn-1-amine (2 mmol) and D<sub>2</sub>O gave crude product that was distilled through a micro column at 5 mmHg to afford **3b** (267 mg, 85%) as a colourless oil. b.p. 107 – 109 °C (5 mmHg).

<sup>1</sup>H NMR (500MHz, CDCl<sub>3</sub>): δ = 0.90 (s, 3H, C(10)H<sub>3</sub>), 1.27 – 1.30 (m, 4H, C(8,9)H<sub>2</sub>), 1.35 – 1.39 (m, 2H, C(4)H<sub>2</sub>), 2.03 – 2.07 (m, 2H, C(3)H<sub>2</sub>), 2.24 (s, 6H, C(6,7)H<sub>3</sub>), 2.94 (d, *J* = 6 Hz, 2H, C(5)H<sub>2</sub>).

<sup>13</sup>C NMR (500MHz, CDCl<sub>3</sub>): δ = 14.04 (C(10)), 22.54 (C(9)), 27.28 – 27.42 (C(3)), 29.23 (C(4)), 31.48 (C(8)), 45.25 (C(6,7)), 56.09 (d, *J* = 11 Hz, C(5)), 126.57 (d, *J* = 17 Hz, C(1)), 132.85 (d, *J* = 15 Hz, C(2)).

MS (EI): *m/z*, % = 157 (26) [M<sup>+</sup>], 100 (21), 86 (36).

Anal. calcd for C<sub>10</sub>H<sub>19</sub>D<sub>2</sub>N, (%): C, 76.36; N, 8.90; Found, %: C, 76.39; N, 9.02.

### **(Z)-4-(hept-2-en-1-yl-2,3-d<sub>2</sub>)morpholine (3e)**

Using the procedure described above 362 mg of 4-(hept-2-yn-1-yl)morpholine (2 mmol) and D<sub>2</sub>O gave crude product that was distilled through a micro column at 2,4 mmHg to afford **3e** (259 mg, 70%) as a colourless oil. b.p. 119 – 121 °C (2,4 mmHg).

$^1\text{H}$  NMR (500MHz,  $\text{CDCl}_3$ ):  $\delta$  = 0.91 (t,  $J$  = 6 Hz, 3H, C(11) $\text{H}_3$ ), 1.23 – 1.28 (m, 4H, C(4,10) $\text{H}_2$ ), 2.07 (t,  $J$  = 6 Hz, 2H, C(3) $\text{H}_2$ ), 2.47 (s, 4H, C(6,7) $\text{H}_2$ ), 3.03 (s, 2H, C(5) $\text{H}_2$ ), 3.73 (s, 4H, C(8,9) $\text{H}_2$ ).

$^{13}\text{C}$  NMR (500MHz,  $\text{CDCl}_3$ ):  $\delta$  = 13.96 (C(11)), 22.32 (C(10)), 27.07 (C(3)), 31.68 (C(4)), 53.59 (C(6,7)), 55.34 (C(5)), 66.99 (C(8,9)).

MS (EI):  $m/z$ , % = 185 (7) [ $\text{M}^+$ ], 156 (1), 128 (6), 112 (19), 87 (100), 57 (70), 57 (70), 42 (13).

Anal. calcd for  $\text{C}_{11}\text{H}_{19}\text{D}_2\text{NO}$ , (%): C, 71.30; N, 7.56; Found, %: C, 71.46; N, 7.42.

Preparation of allylamines **5a-d**, **6d**, **7b** via Zr-Mg-catalyzed reaction of substituted propargylamines with  $\text{Et}_2\text{Zn}$ .

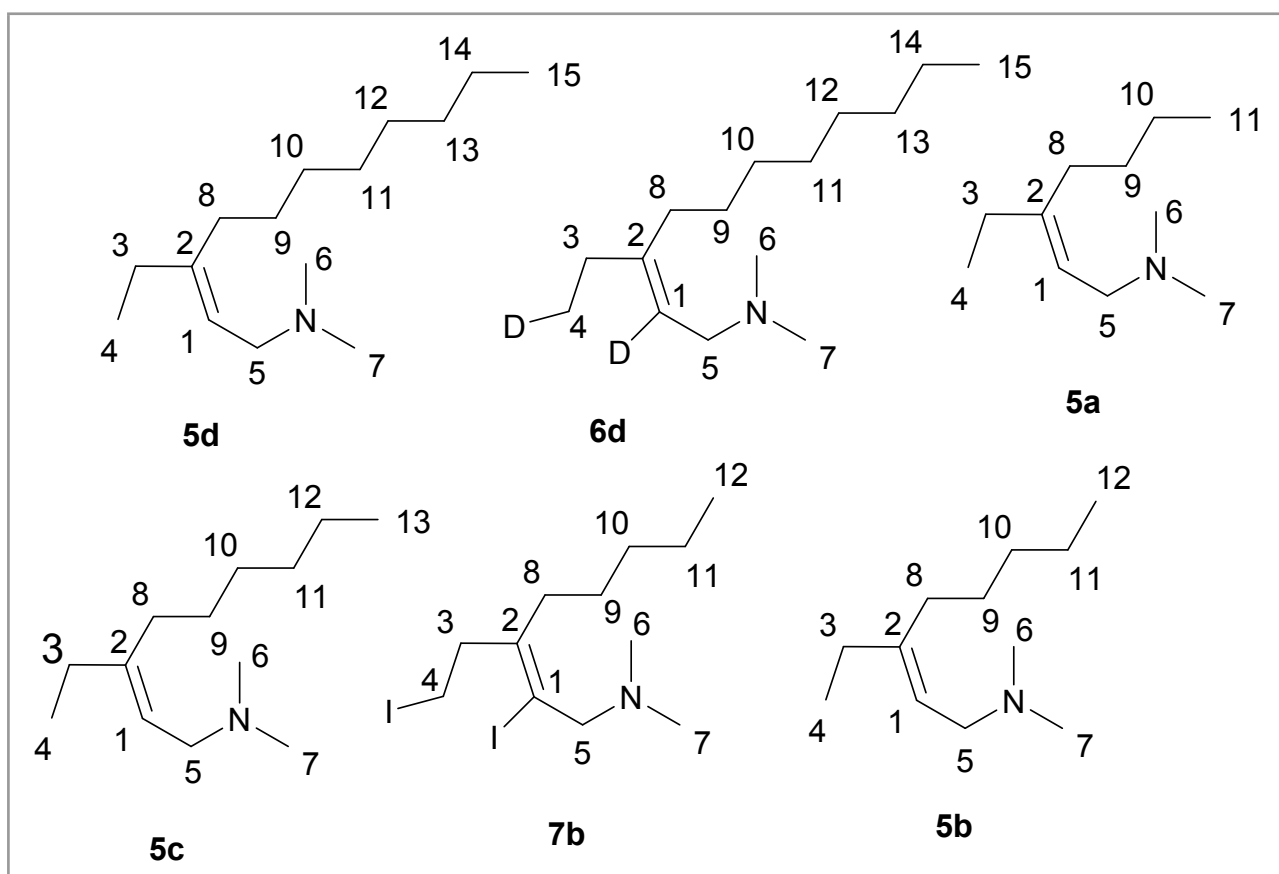

**Figure 2.** The numbering of atoms in the  $^{13}\text{C}$ - and  $^1\text{H}$ -NMR spectra of the compounds **5a-d**, **6d**, **7b**.

(*Z*)-3-ethyl-*N,N*-dimethylundec-2-en-1-amine; Typical Procedure.

To a solution of *N,N*-dimethylundec-2-yn-1-amine (390 mg, 2 mmol) and  $\text{Et}_2\text{Zn}$  (1 M in hexanes, 5 mL, 5 mmol) in  $\text{Et}_2\text{O}$  (6 mL) was added  $\text{Cp}_2\text{ZrCl}_2$  (0.058g, 0.20 mmol). Ethylmagnesium bromide (1.6 M in  $\text{Et}_2\text{O}$ , 0.25 mL, 0.4 mmol) was then added and the reaction mixture rapidly turned black. After 18h at r.t.  $^\circ\text{C}$ , the reaction mixture was diluted with  $\text{Et}_2\text{O}$  (5 mL), and 25 wt% KOH solution (3 mL) was added dropwise while the reaction flask was cooled in an ice bath. The

aqueous layer was extracted with diethyl ether (3×10 mL). The combined organic layers were washed with brine (20 mL), dried over anhydrous MgSO<sub>4</sub>. The reaction mixture was filtered through a filter paper and concentrated in vacuo to give crude product as a yellow oil. The residue was distilled through a micro column at 1 mmHg to give **5d** (401 mg, 89%) as a colourless oil. b.p. 104 – 107 °C (1 mmHg).

<sup>1</sup>H NMR (500MHz, CDCl<sub>3</sub>): δ = 0.89 (t, *J* = 6 Hz, 3H, C(15)H<sub>3</sub>), 1.01 (t, *J* = 7 Hz, 3H, C(4)H<sub>3</sub>), 1.29 (s, 8H, C(10 - 13)H<sub>2</sub>), 1.32 – 1.38 (m, 4H, C(9,14)H<sub>2</sub>), 2.03 – 2.06 (m, 4H, C(3,8)H<sub>2</sub>), 2.23 (s, 6H, C(6,7)H<sub>3</sub>), 2.91 (d, *J* = 6 Hz, 2H, C(5)H<sub>2</sub>), 5.22 (t, *J* = 6 Hz, 1H, C(1)H).

<sup>13</sup>C NMR (500MHz, CDCl<sub>3</sub>): δ = 12.74 (C(4)), 14.10 (C(15)), 22.07 (C(14)), 28.49 (C(9)), 29.29 (C(10)), 29.52 (C(12)), 29.57 (C(11)), 29.79 (C(3)), 30.58 (C(8)), 31.89 (C(13)), 45.26 (C(6,7)), 56.86 (C(5)), 120.48 (C(1)), 144.41 (C(2)).

MS (EI): *m/z*, % = 225 (32) [M<sup>+</sup>], 210 (15), 196 (17), 180 (14), 151 (19), 112 (47), 95 (100), 82 (81), 67 (74), 58 (79), 46 (96).

Anal. calcd for C<sub>15</sub>H<sub>31</sub>N, (%): C, 79.92; H, 13.86; N, 6.21. Found, %: C, 79.80; H, 13.82; N, 6.01.

### **(Z)-3-ethyl-N,N-dimethylhept-2-en-1-amine (5a)**

Using the procedure described above 390 mg of *N,N*-dimethylhept-2-yn-1-amine (278 mg, 2 mmol) gave crude product that was distilled through a micro column at 10 mmHg to afford **5c** (294 mg, 87%) as a colourless oil. b.p. 88 – 91 °C (10 mmHg). The spectral properties (<sup>1</sup>H NMR, <sup>13</sup>C NMR, MS) were in good agreement with those that were reported in the literature [54].

### **(Z)-3-ethyl-N,N-dimethylnon-2-en-1-amine (5c)**

Using the procedure described above 334 mg of *N,N*-dimethylnon-2-yn-1-amine (2 mmol) gave crude product that was distilled through a micro column at 5 mmHg to afford **5c** (311 mg, 79%) as a colourless oil. b.p. 103 – 106 °C (5 mmHg).

<sup>1</sup>H NMR (500MHz, CDCl<sub>3</sub>): δ = 0.91 (t, *J* = 6 Hz, 3H, C(13)H<sub>3</sub>), 1.03 (t, *J* = 8 Hz, 3H, C(4)H<sub>3</sub>), 1.28 – 1.31 (m, 6H, C(10 - 12)H<sub>2</sub>), 1.33 – 1.39 (m, 2H, C(9)H<sub>2</sub>), 2.03 – 2.07 (m, 4H, C(3,8)H<sub>2</sub>), 2.25 (s, 6H, C(6,7)H<sub>3</sub>), 2.93 (d, *J* = 6 Hz, 2H, C(5)H<sub>2</sub>), 5.23 (t, *J* = 7 Hz, 1H, C(1)H).

<sup>13</sup>C NMR (500MHz, CDCl<sub>3</sub>): δ = 12.75 (C(4)), 14.09 (C(13)), 22.65 (C(12)), 28.47 (C(9)), 29.59 (C(10)), 29.70 (C(3)), 31.79 (C(11)), 45.24 (C(6,7)), 56.84 (C(5)), 120.41 (C(1)), 144.51 (C(2)).

MS (EI): *m/z*, % = 197 (32) [M<sup>+</sup>], 182 (17), 168 (20), 152 (22), 123 (55), 112 (49), 95 (82), 82 (93), 67 (74), 58 (88), 46 (100).

Anal. calcd for C<sub>13</sub>H<sub>27</sub>N, (%): C, 79.11; H, 13.79; N, 7.10. Found, %: C, 79.10; H, 13.74; N, 6.89.

### **(Z)-3-ethyl-N,N-dimethyloct-2-en-1-amine (5b)**

Using the procedure described above 306 mg of *N,N*-dimethyloct-2-yn-1-amine (2 mmol) gave crude product that was distilled through a micro column at 5 mmHg to afford **5b** (307 mg, 84%) as a colourless oil. b.p. 91 – 93 °C (5 mmHg). The spectral properties (<sup>1</sup>H NMR, <sup>13</sup>C NMR, MS) were in good agreement with those that were reported in the literature [54].

### **(Z)-3-(ethyl-2-d)-N,N-dimethylundec-2-en-1-amine-2-d (6d)**

Using the procedure described above 390 mg of *N,N*-dimethylundec-2-yn-1-amine (2 mmol) gave crude product that was distilled through a micro column at 1 mmHg to afford **6d** (409 mg, 90%) as a colourless oil. b.p. 103 – 106 °C (1 mmHg).

<sup>1</sup>H NMR (500MHz, CDCl<sub>3</sub>): δ = 0.90 (t, *J* = 6 Hz, 3H, C(15)H<sub>3</sub>), 1.02 (qv, *J* = 7 Hz, 2H, C(4)H<sub>2</sub>D), 1.29 (s, 8H, C(10 - 13)H<sub>2</sub>), 1.31 – 1.35 (M, 4H, C(9,14)H<sub>2</sub>), 2.06 – 2.11 (M, 4H, C(3, 8)H<sub>2</sub>), 2.19 (s, 6H, C(6,7)H<sub>3</sub>), 2.87 (s, 2H, C(5)H<sub>2</sub>).

<sup>13</sup>C NMR (500MHz, CDCl<sub>3</sub>): δ = 12.57 (t, *J* = 19 Hz, C(4)), 14.12 (C(15)), 22.69 (C(14)), 27.45 (C(8)), 28.28 (C(3)), 29.30 (C(10)), 29.37 (C(12)), 29.54 (C(11)), 30.03 (C(9)), 31.91 (C(13)), 45.47 (C(6,7)), 58.31 (C(5)).

MS (EI): *m/z*, % = 227 (12) [M<sup>+</sup>], 212 (20), 210 (11), 198 (23).

Anal. calcd for C<sub>15</sub>H<sub>29</sub>D<sub>2</sub>N, (%): C, 79.22; N, 6.16. Found, %: C, 79.36; N, 6.12.

### **(Z)-2-iodo-3-(2-iodoethyl)-N,N-dimethylnon-2-en-1-amine (7b)**

To a solution of *N,N*-dimethyloct-2-yn-1-amine (306 mg, 2 mmol) and Et<sub>2</sub>Zn (1 M in hexanes, 5 mL, 5 mmol) in ether (6 mL) was added Cp<sub>2</sub>ZrCl<sub>2</sub> (0.058g, 0.20 mmol). Ethylmagnesium bromide (1.6 M in Et<sub>2</sub>O, 0.25 mL, 0.4 mmol) was then added and the reaction mixture rapidly turned black. After 18 h at 23 °C, the reaction mixture was cooled to -78 °C, and a solution of I<sub>2</sub> (1575 mg, 12.5 mmol) in THF (12.5 mL) was added via cannula. The reaction mixture was warmed to 23 °C, and stirred overnight. The mixture was then partitioned between 25% aqueous KOH and ether. The organic layer was washed with water and aqueous Na<sub>2</sub>S<sub>2</sub>O<sub>3</sub>, drying over MgSO<sub>4</sub>. Evaporation of solvent and purification of the residue by column chromatography (hexane/ethyl acetate, 5:1) gave a yellow oil; yield: 487 mg, (56%); *R<sub>f</sub>* = 0.68 (hexane/ethyl acetate, 5:1). The spectral properties (<sup>1</sup>H NMR, <sup>13</sup>C NMR, MS) were in good agreement with those that were reported in the literature [54]. Anal. calcd for C<sub>13</sub>H<sub>25</sub>I<sub>2</sub>N, (%): C, 33.12; H, 5.33; N, 3.22. Found, %: C, 32.91; H, 5.30; N, 3.21.

## **Acknowledgements**



This work was financially supported by the Russian Science Foundation (grant No. 19-73-10113).

### **References**

1. Shaibakova, M. G.; Titova, I. G.; Ibragimov, A. G.; Dzhemilev U. M., Russ. J. Org. Chem. 2008, 44, 1126 - 1129.
2. Bieber, L. W.; da Silva, M. F. Tetrahedron Lett. 2004, 45, 8281 - 8428.

$^1\text{H-NMR}$  spectrum of (*Z*)-3-ethyl-*N,N*-dimethylundec-2-en-1-amine (5d)

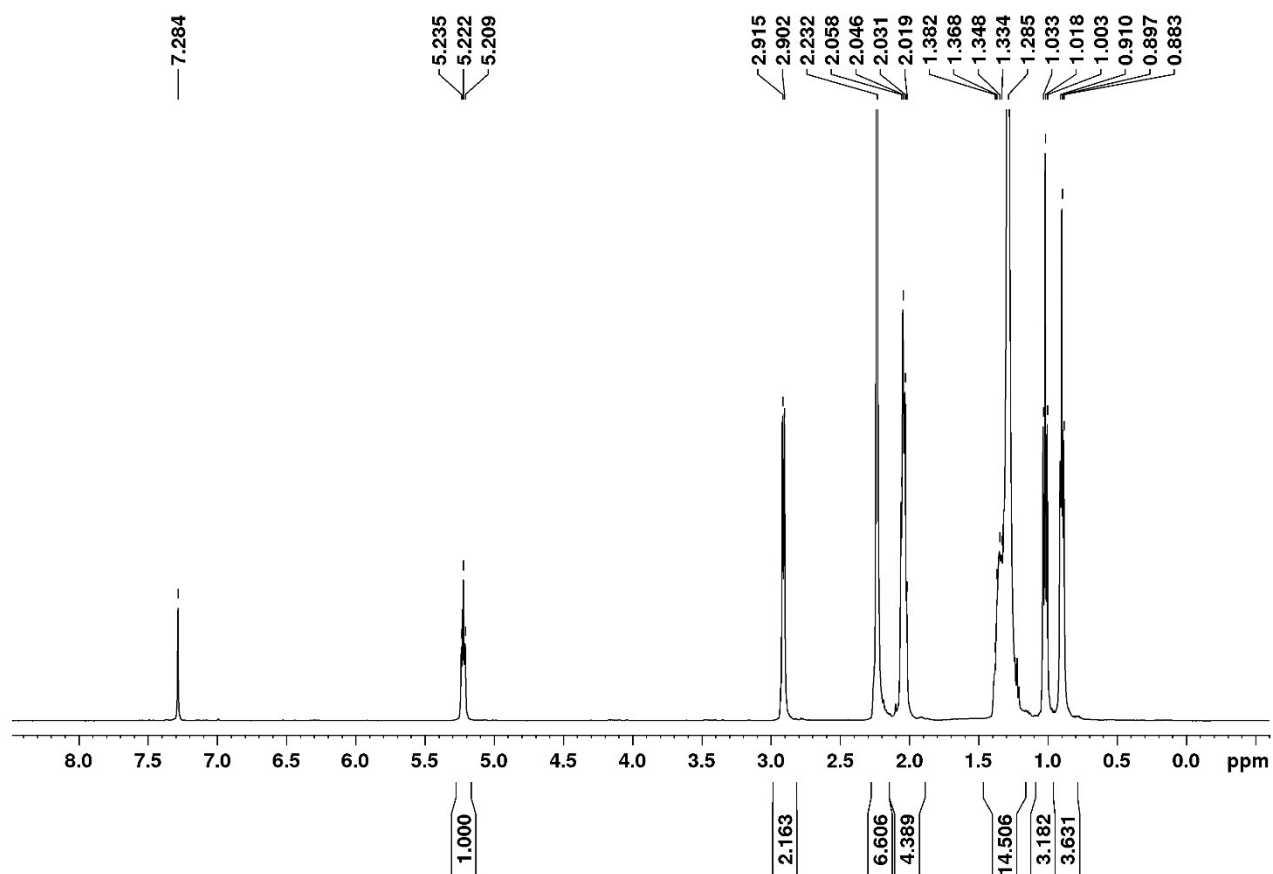

$^{13}\text{C-NMR}$  spectrum of (*Z*)-3-ethyl-*N,N*-dimethylundec-2-en-1-amine (5d)

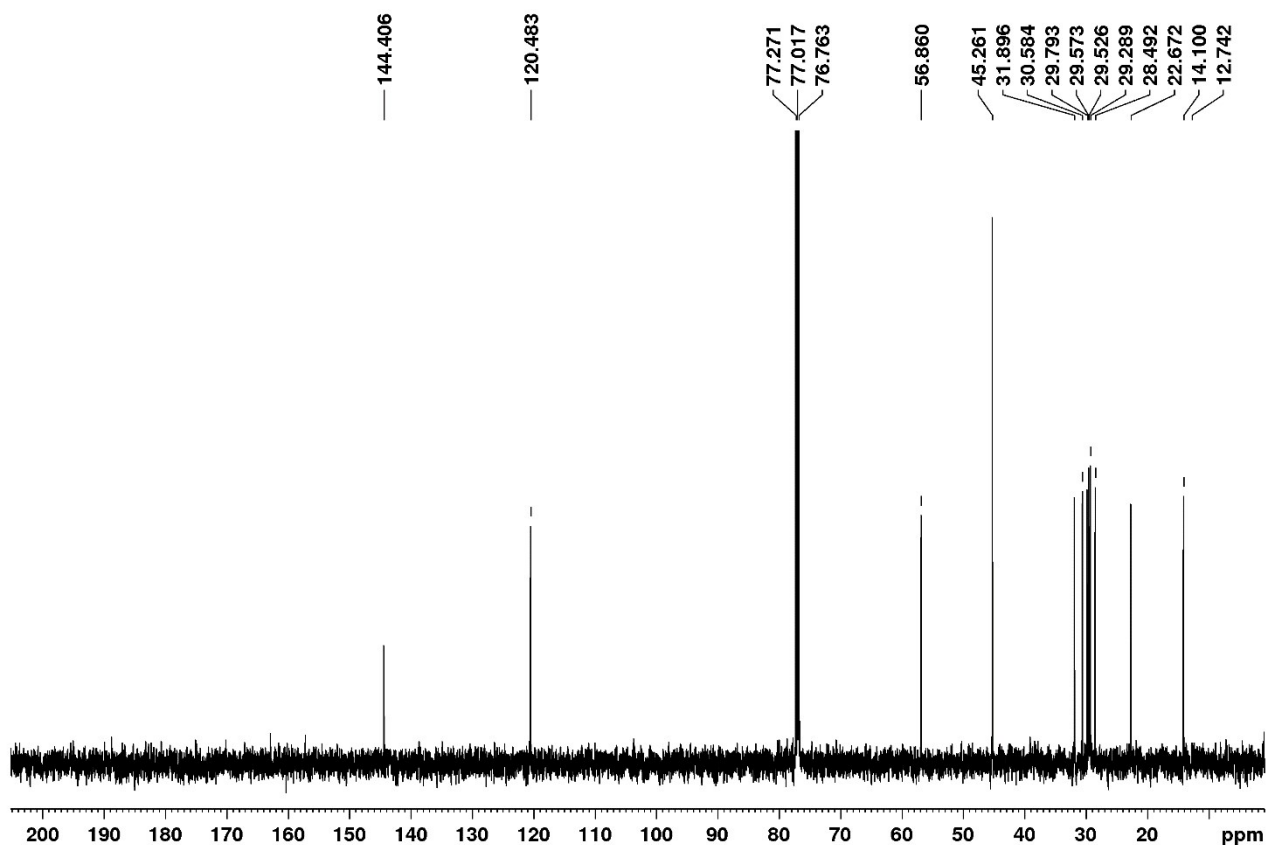

$^1\text{H-NMR}$  spectrum of (*Z*)-3-(ethyl-2-*d*)-*N,N*-dimethylundec-2-en-1-amine-2-*d* (6d)

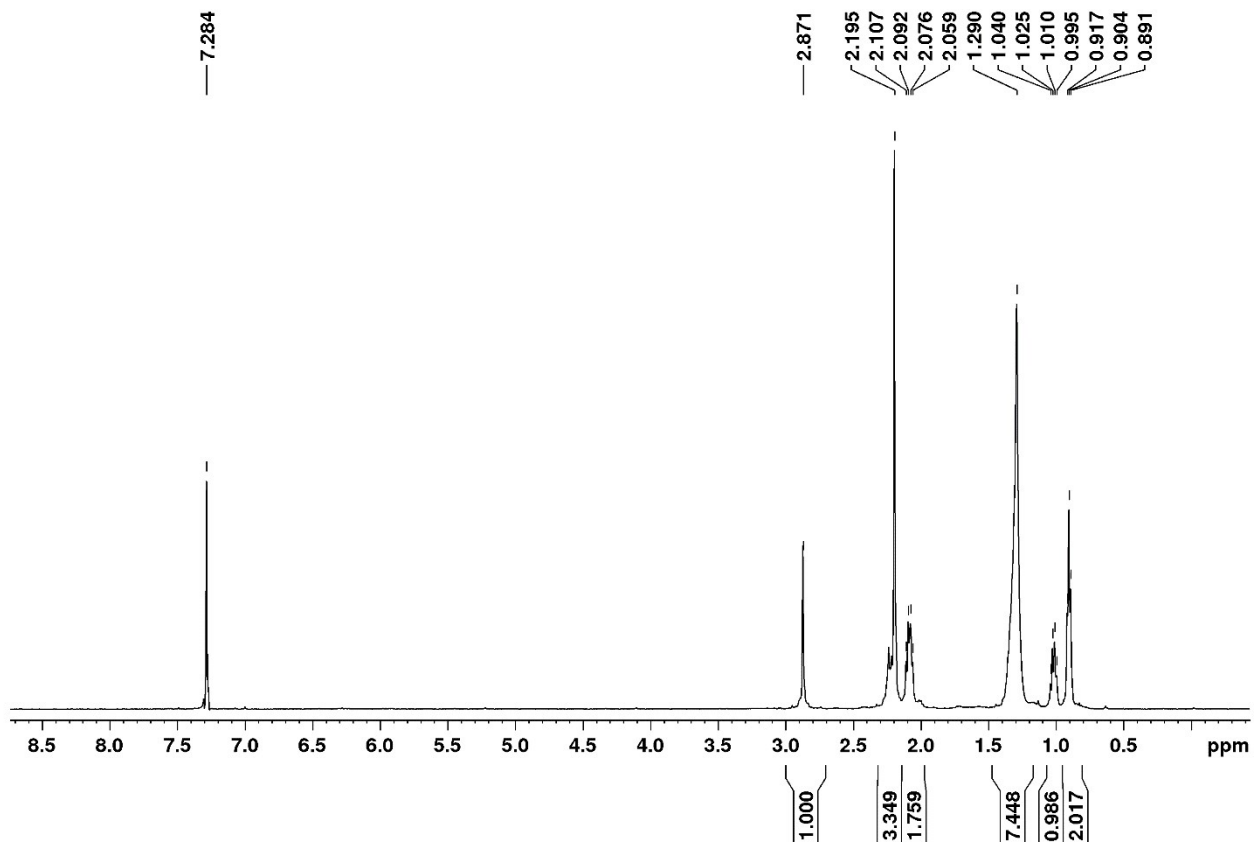

$^{13}\text{C-NMR}$  spectrum of (*Z*)-3-(ethyl-2-*d*)-*N,N*-dimethylundec-2-en-1-amine-2-*d* (6d)

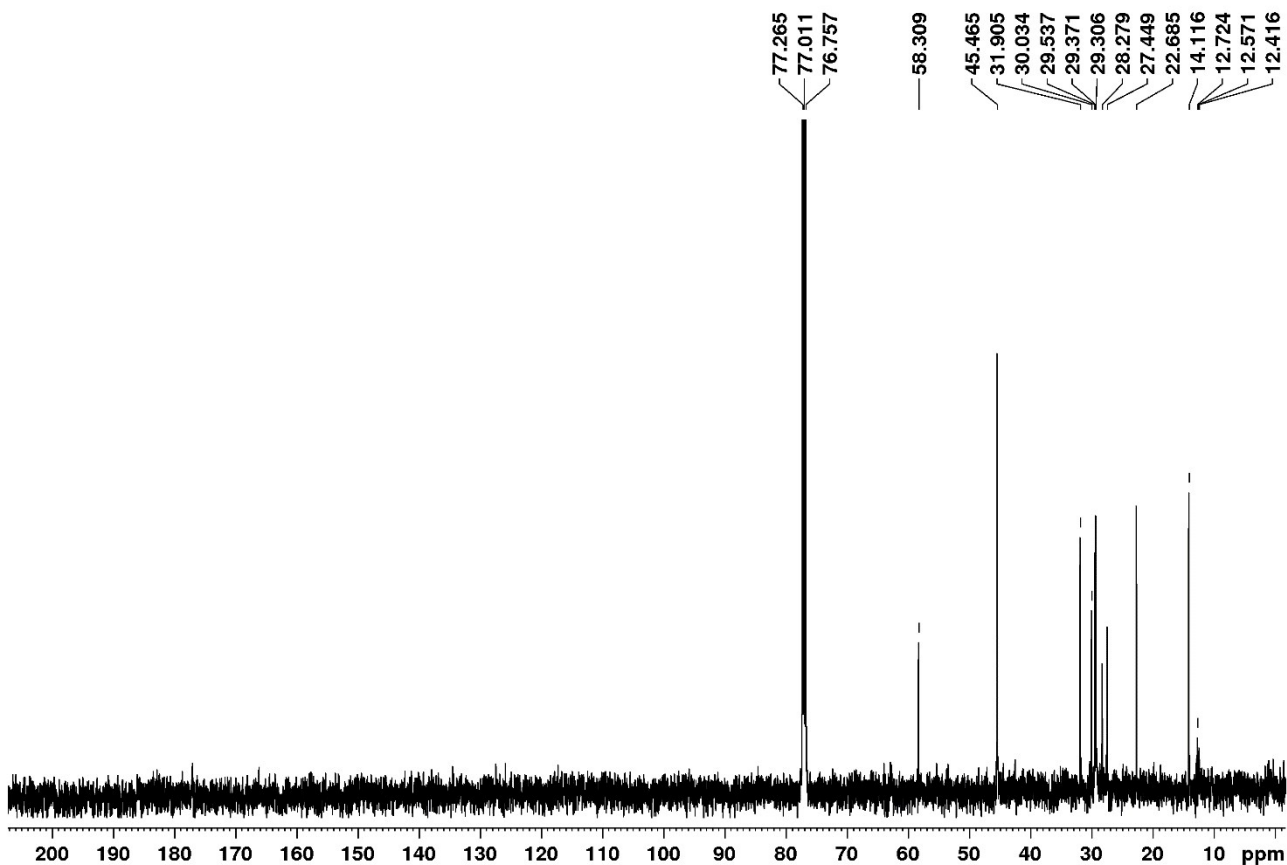

$^1\text{H-NMR}$  spectrum of (*Z*)-4-(non-2-en-1-yl)morpholine (2c)

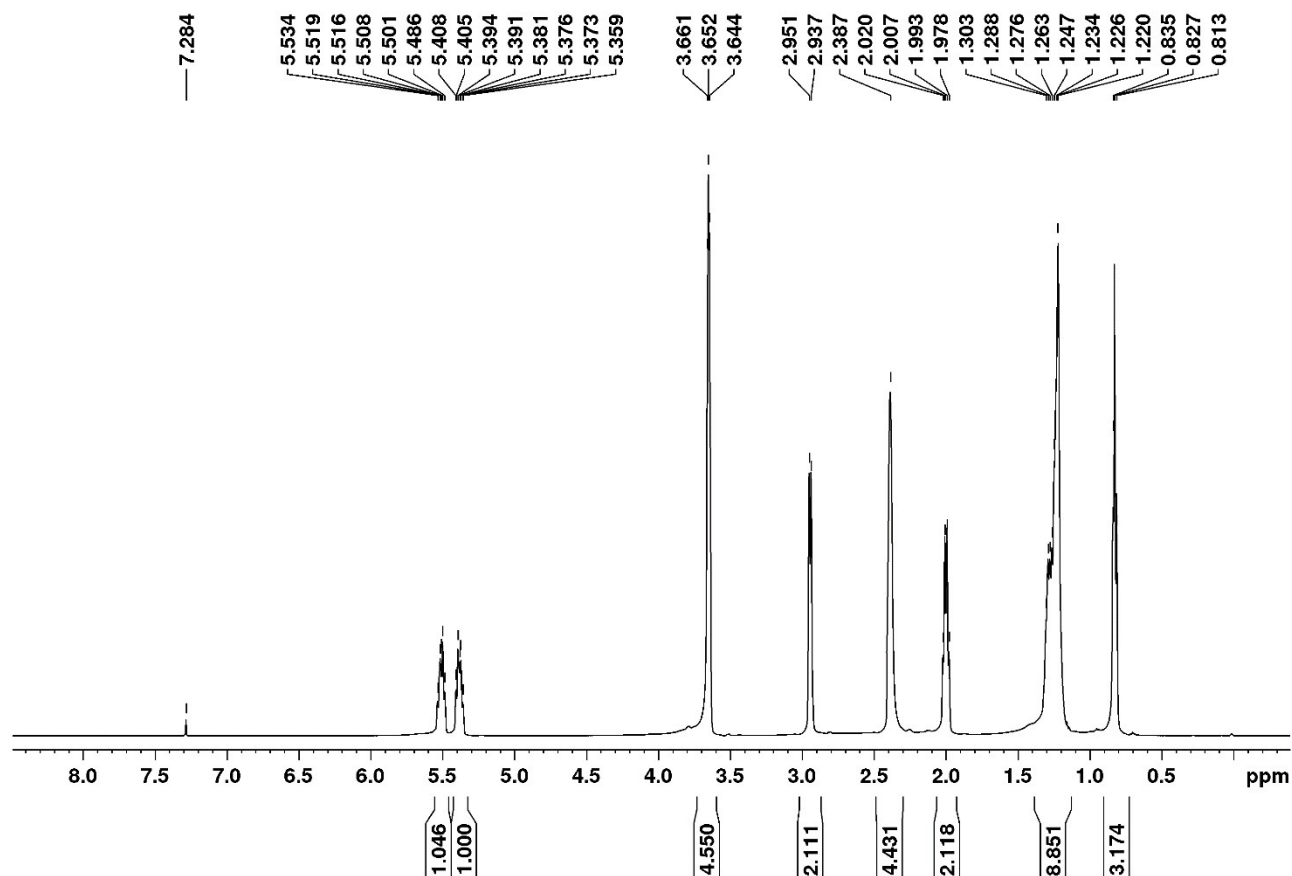

$^{13}\text{C-NMR}$  spectrum of (*Z*)-4-(non-2-en-1-yl)morpholine (2c)

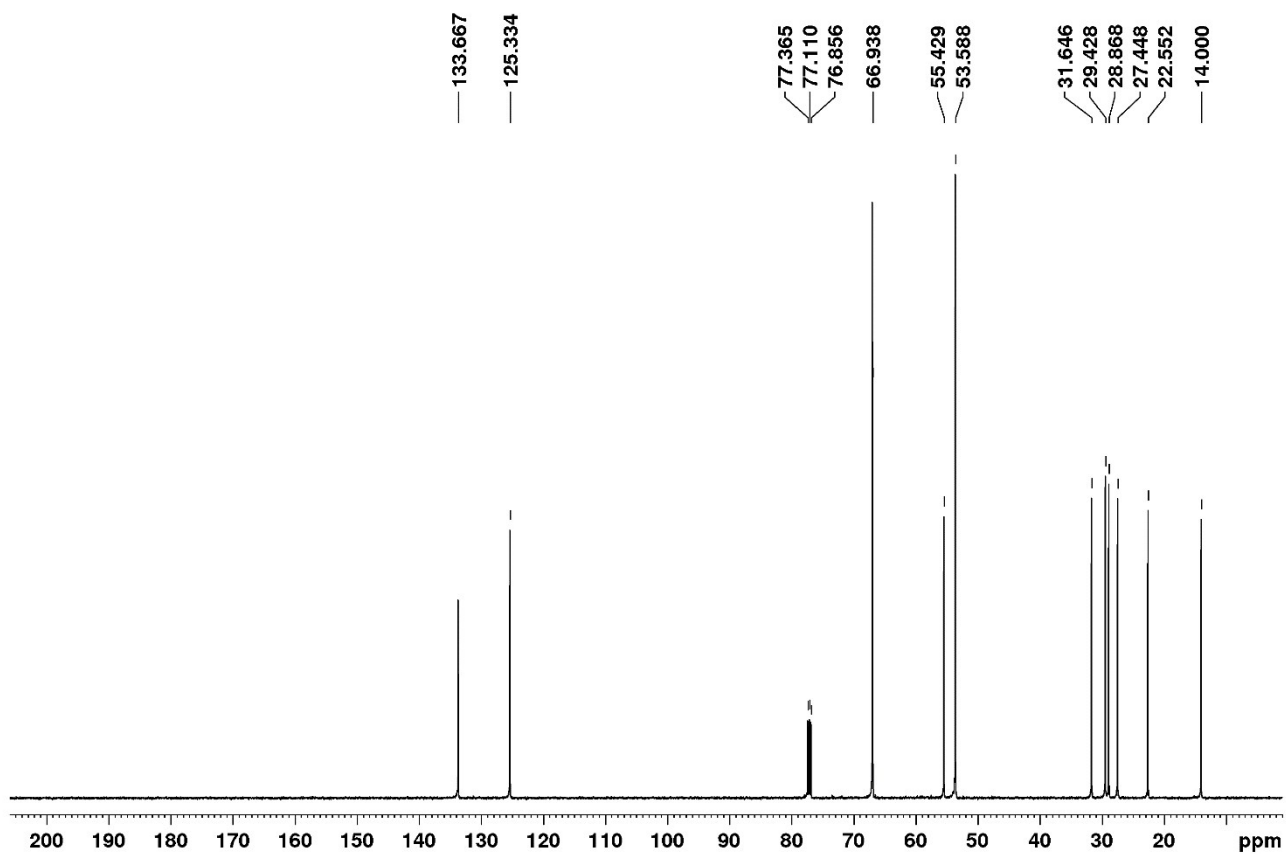

$^1\text{H-NMR}$  spectrum of (*Z*)-3-ethyl-*N,N*-dimethylnon-2-en-1-amine (5c)

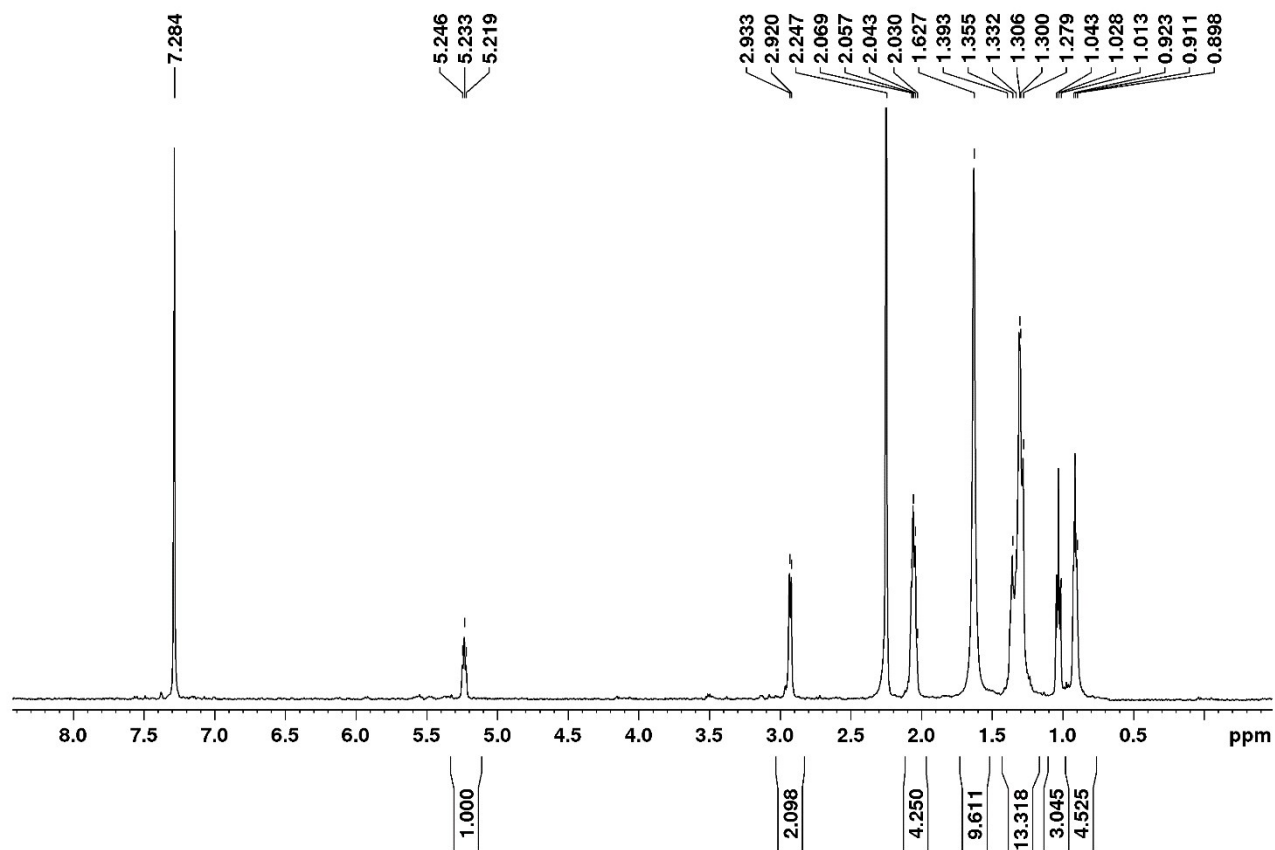

$^{13}\text{C-NMR}$  spectrum of (*Z*)-3-ethyl-*N,N*-dimethylnon-2-en-1-amine (5c)

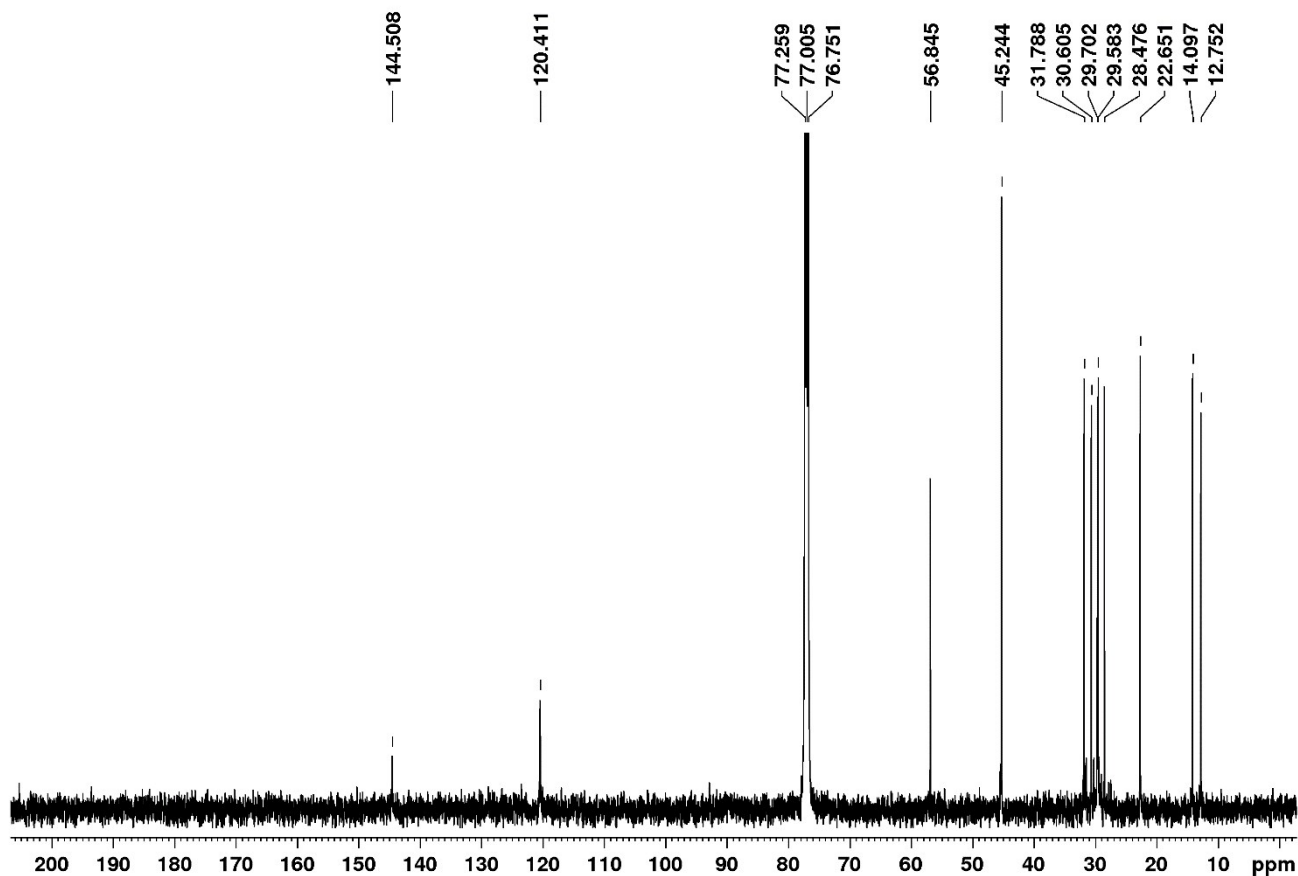

$^1\text{H-NMR}$  spectrum of (*Z*)-*N,N*-dimethyloct-2-en-1-amine (2b)

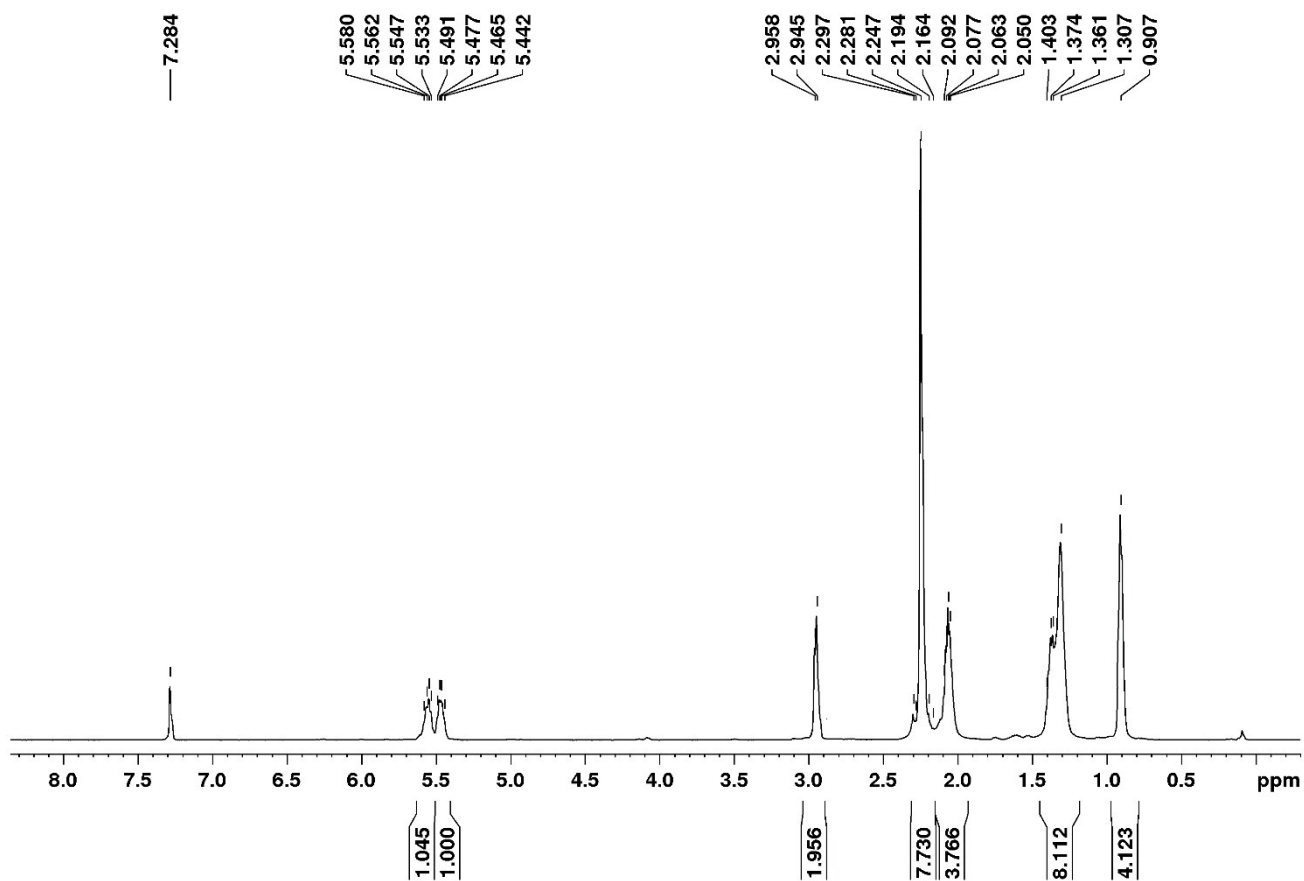

$^{13}\text{C-NMR}$  spectrum of (*Z*)-*N,N*-dimethyloct-2-en-1-amine (2b)

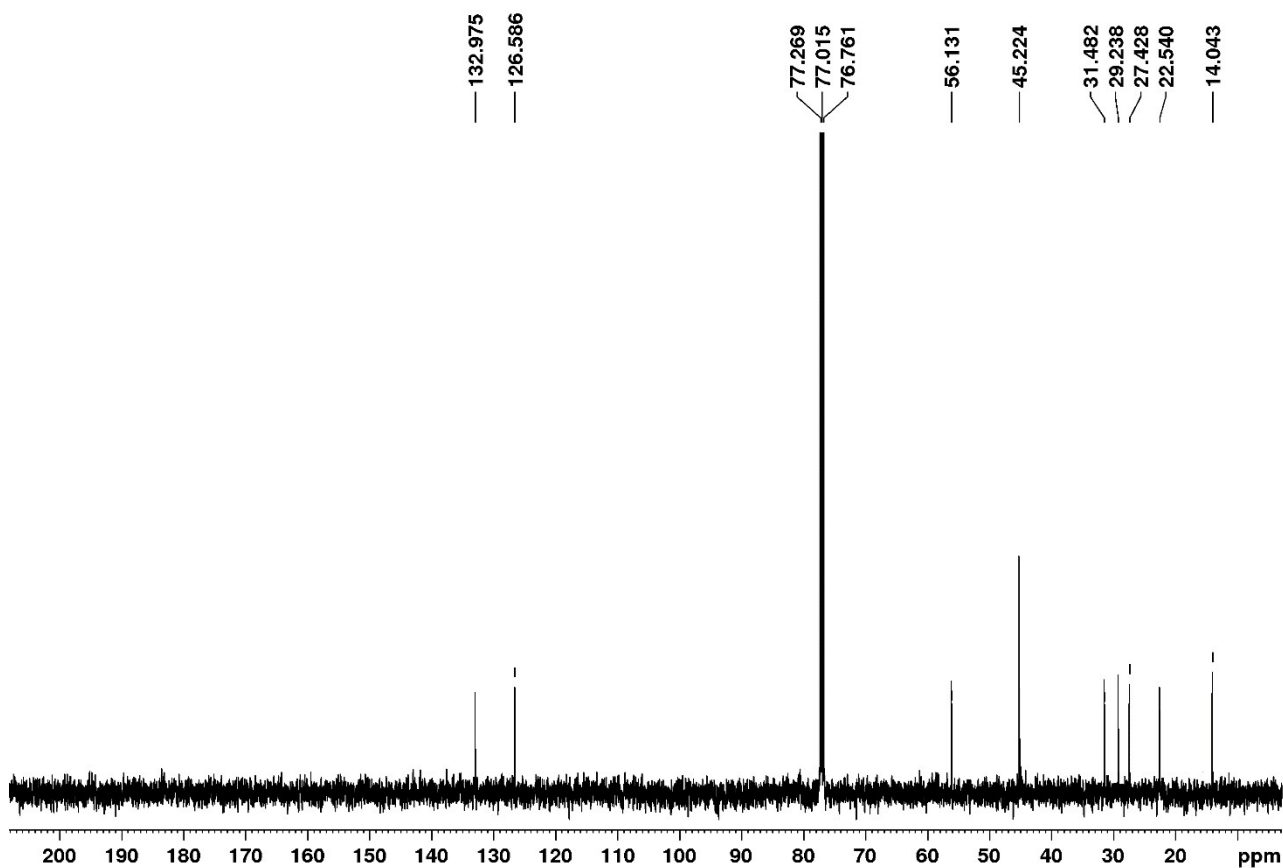

$^1\text{H-NMR}$  spectrum of (*Z*)-4-(hept-2-en-1-yl)morpholine (2e)

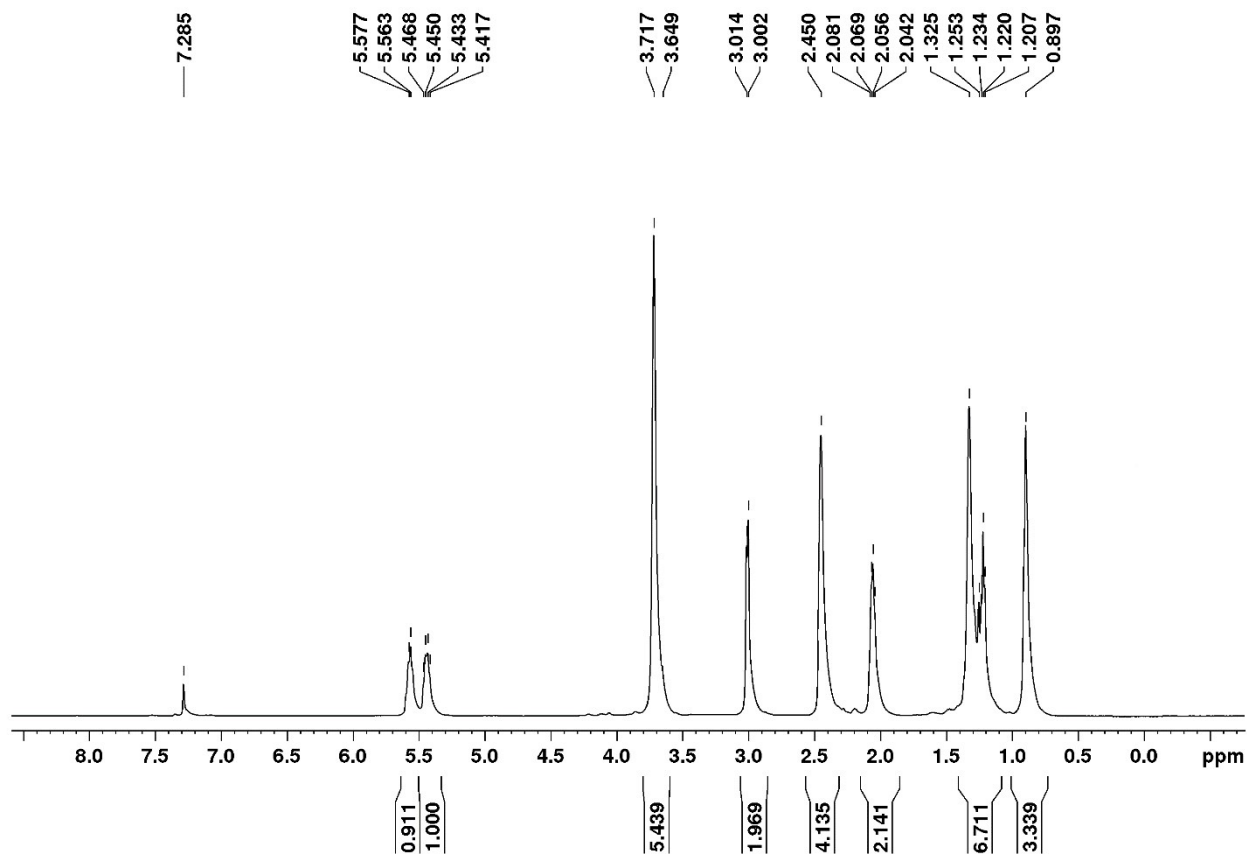

$^{13}\text{C-NMR}$  spectrum of (*Z*)-4-(hept-2-en-1-yl)morpholine (2e)

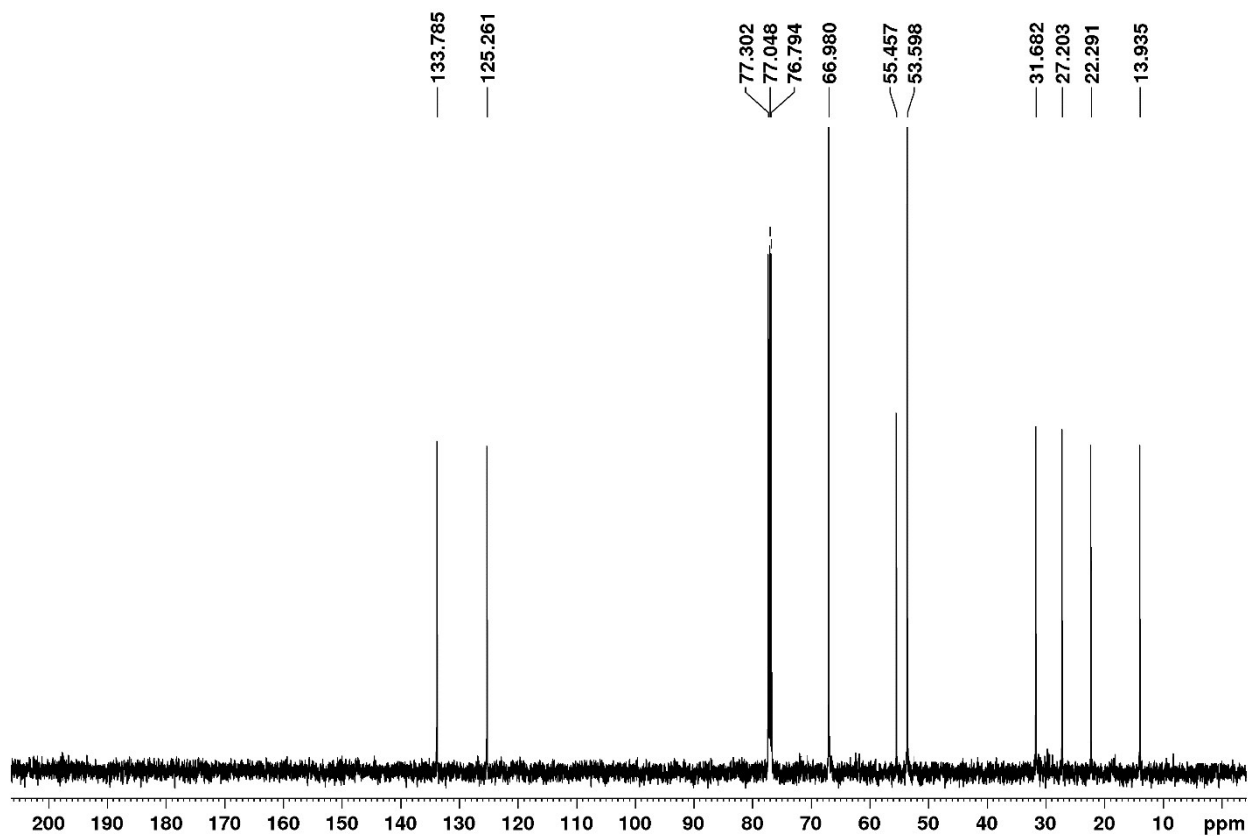

$^1\text{H-NMR}$  spectrum of (*Z*)-*N,N*-dimethyloct-2-en-1-amine-2,3- $d_2$  (3b)

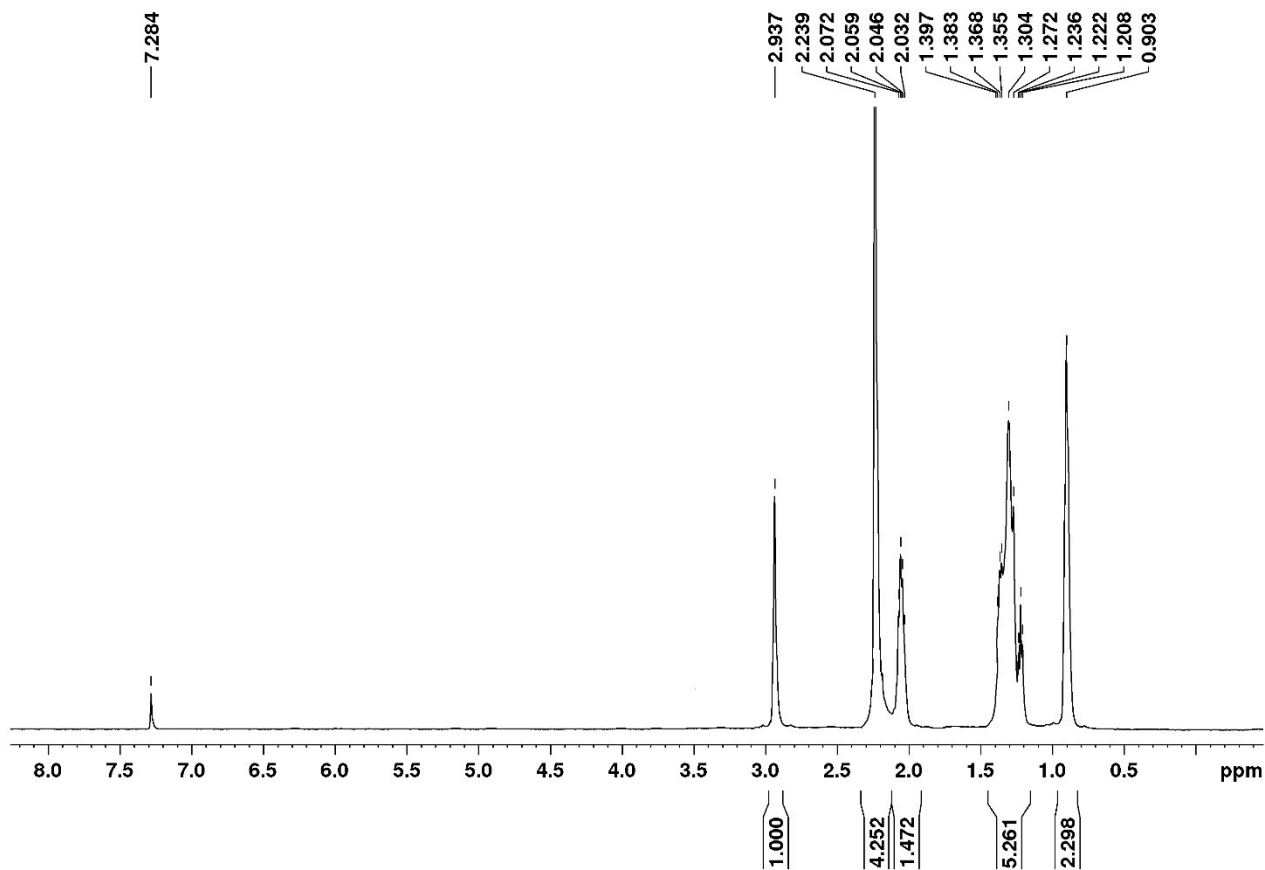

$^{13}\text{C-NMR}$  spectrum of (*Z*)-*N,N*-dimethyloct-2-en-1-amine-2,3- $d_2$  (3b)

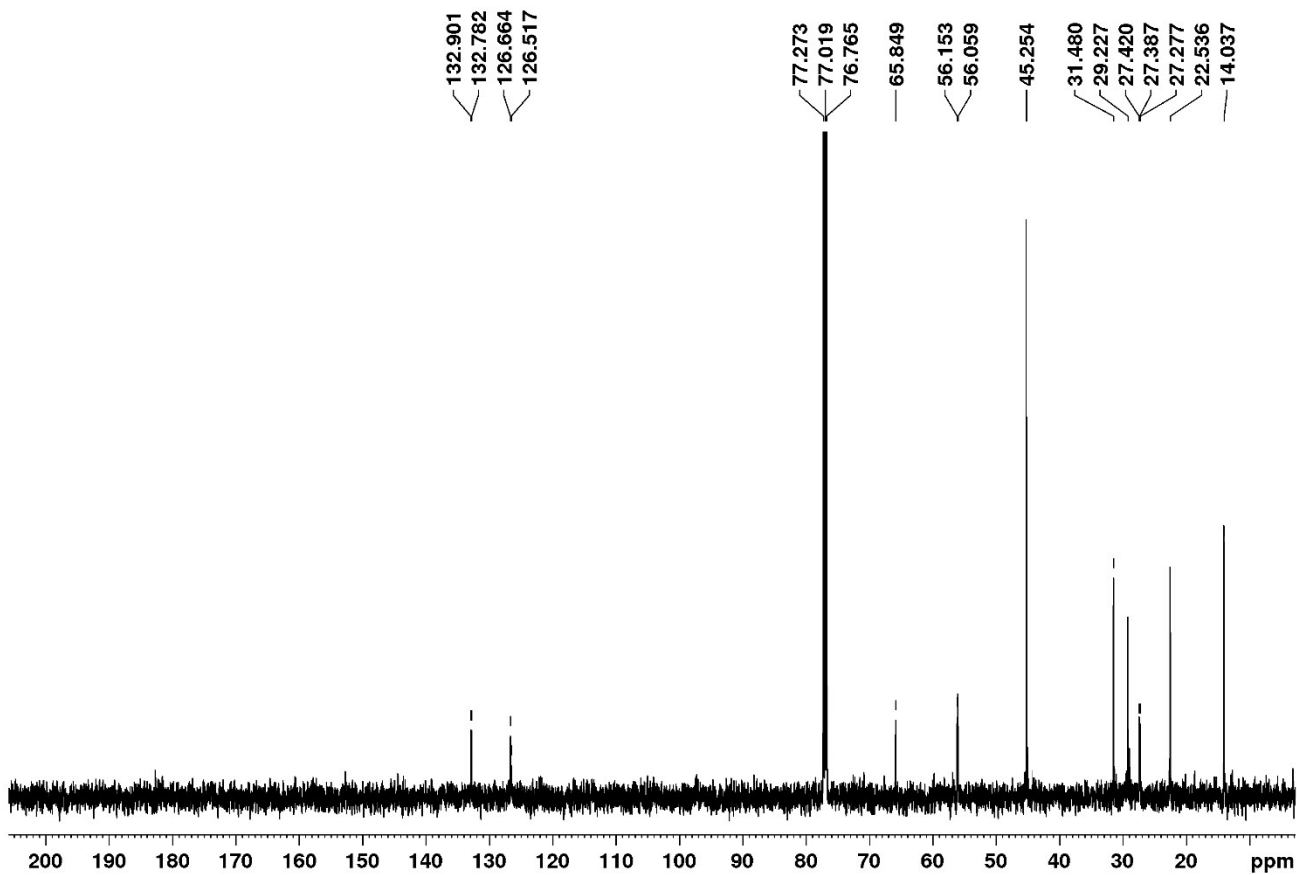



$^1\text{H-NMR}$  spectrum of (*Z*)-*N,N*-dimethylundec-2-en-1-amine (2d)

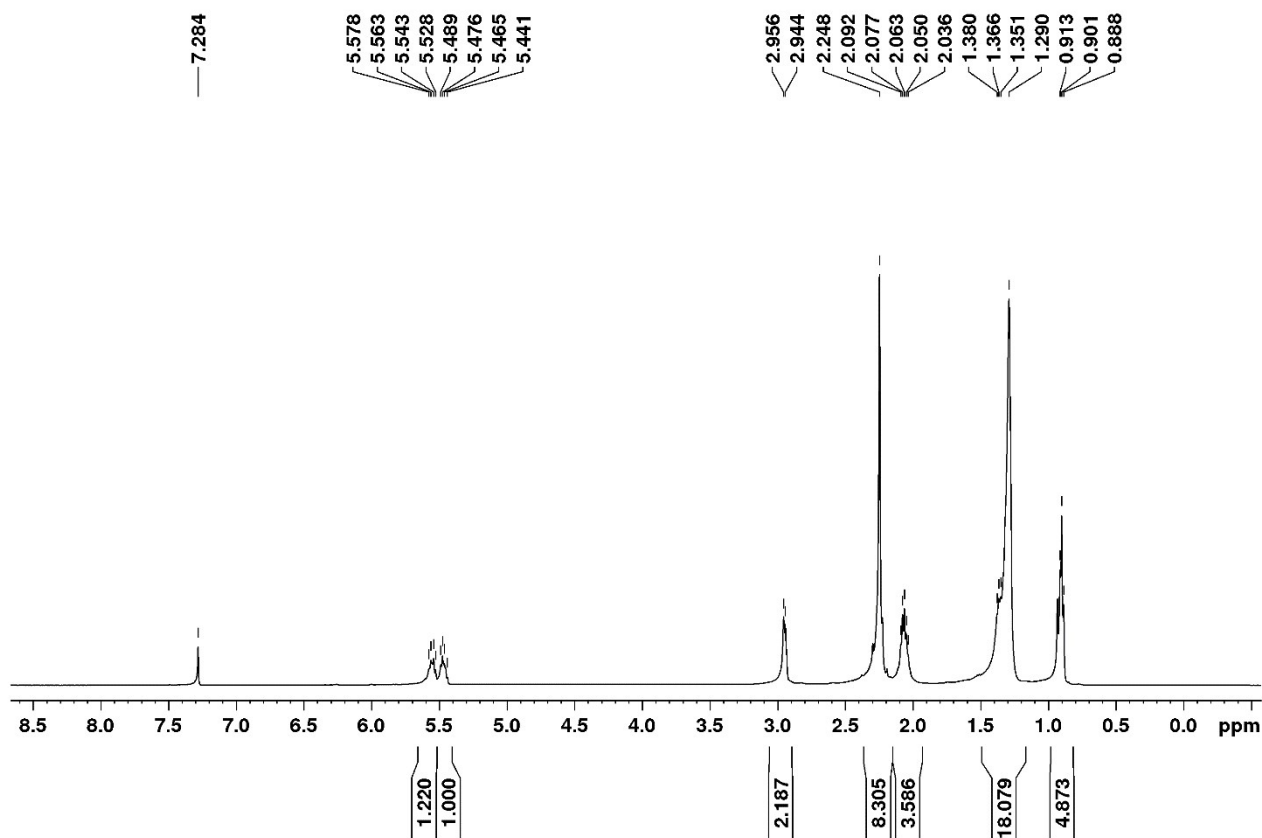

$^{13}\text{C-NMR}$  spectrum of (*Z*)-*N,N*-dimethylundec-2-en-1-amine (2d)

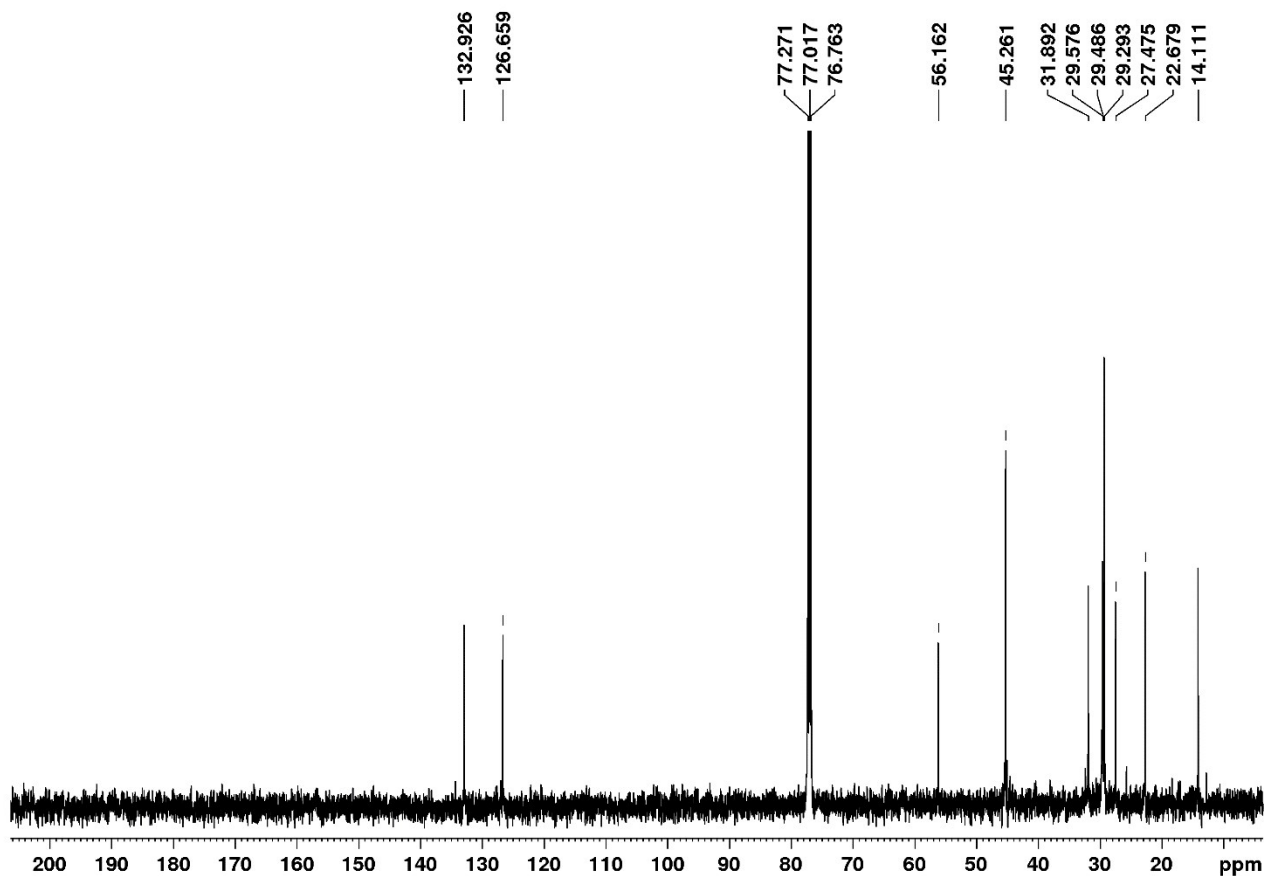

<sup>1</sup>H-NMR spectrum of (Z)-1-(hept-2-en-1-yl)piperidine (2a)

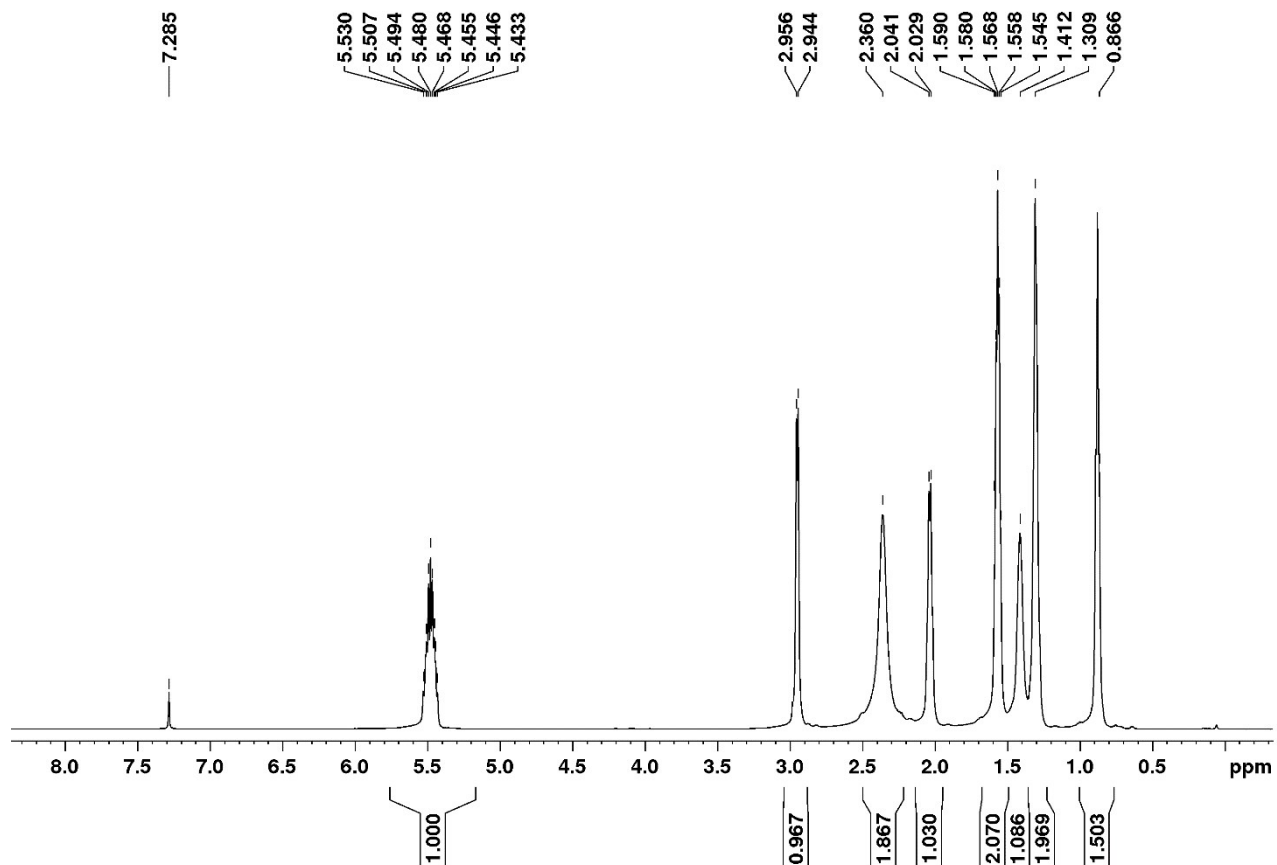

<sup>13</sup>C-NMR spectrum of (Z)-1-(hept-2-en-1-yl)piperidine (2a)

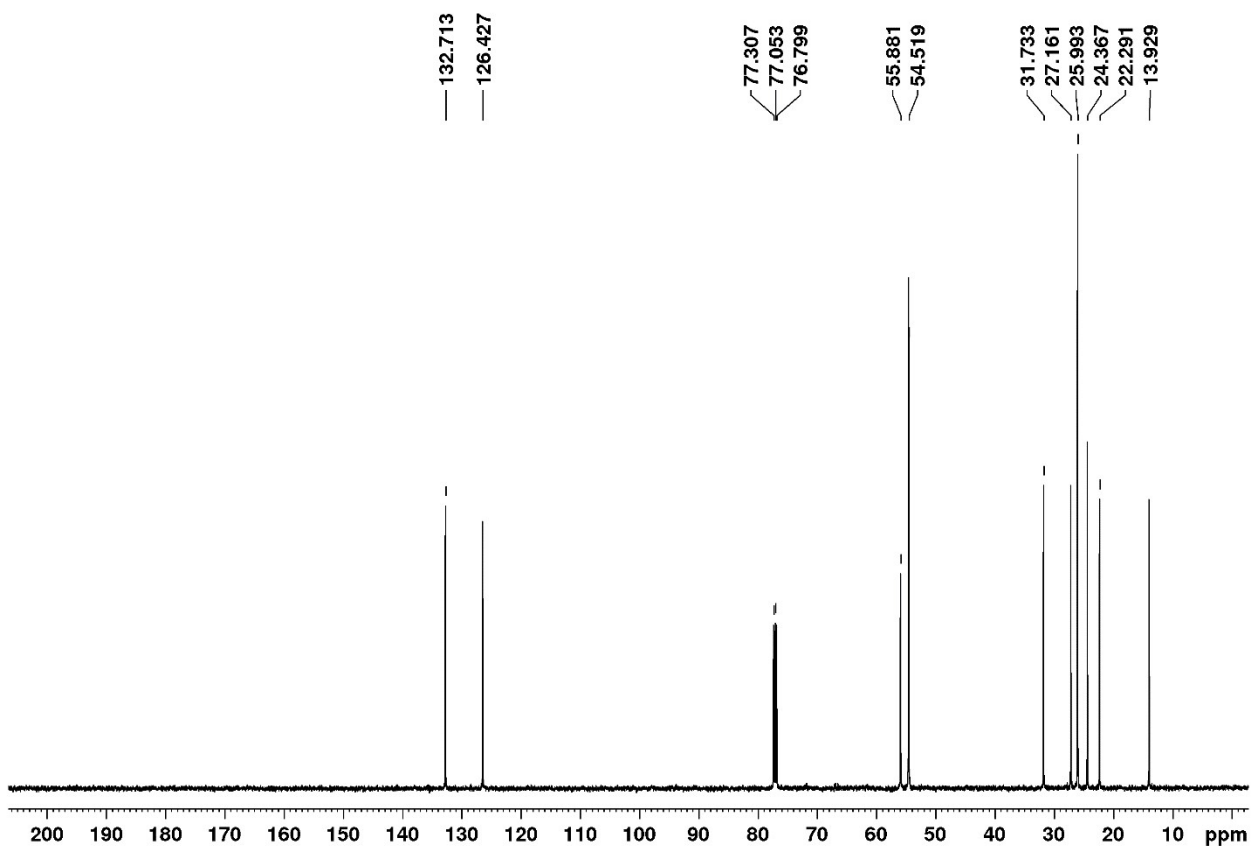

$^1\text{H-NMR}$  spectrum of (*Z*)-*N,N*-dimethyl-5-phenylpent-2-en-1-amine (2f)

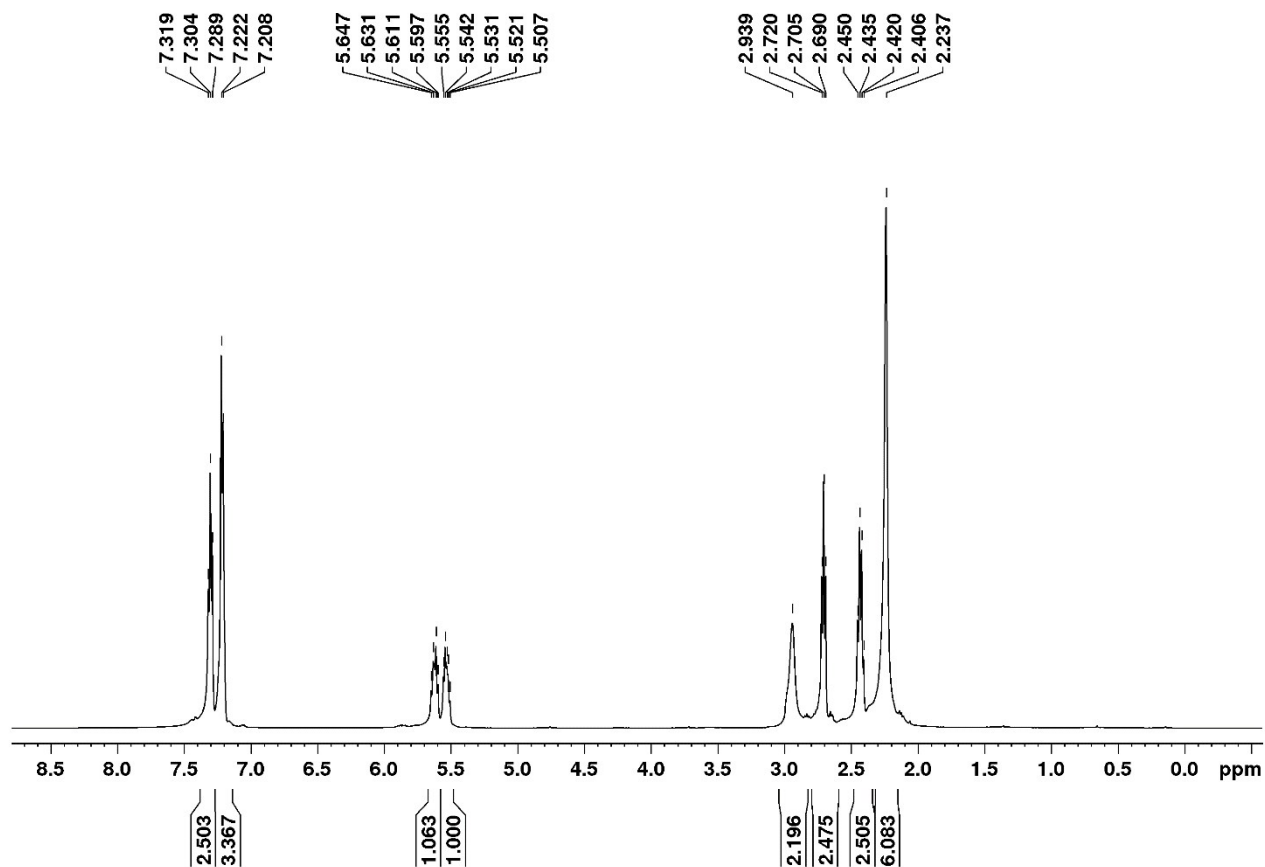

$^{13}\text{C-NMR}$  spectrum of (*Z*)-*N,N*-dimethyl-5-phenylpent-2-en-1-amine (2f)

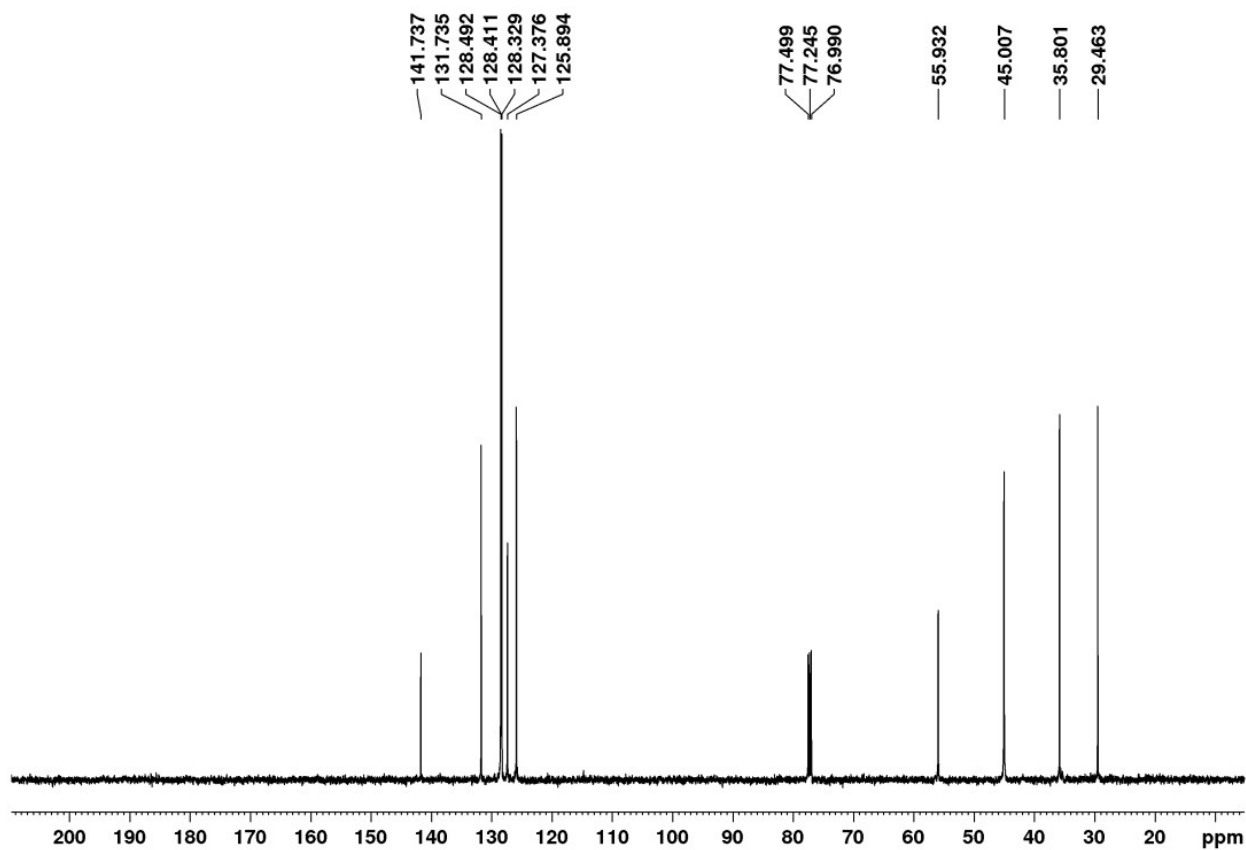

$^1\text{H-NMR}$  spectrum of (*Z*)-4-(3-cyclopropylallyl)morpholine (2g)

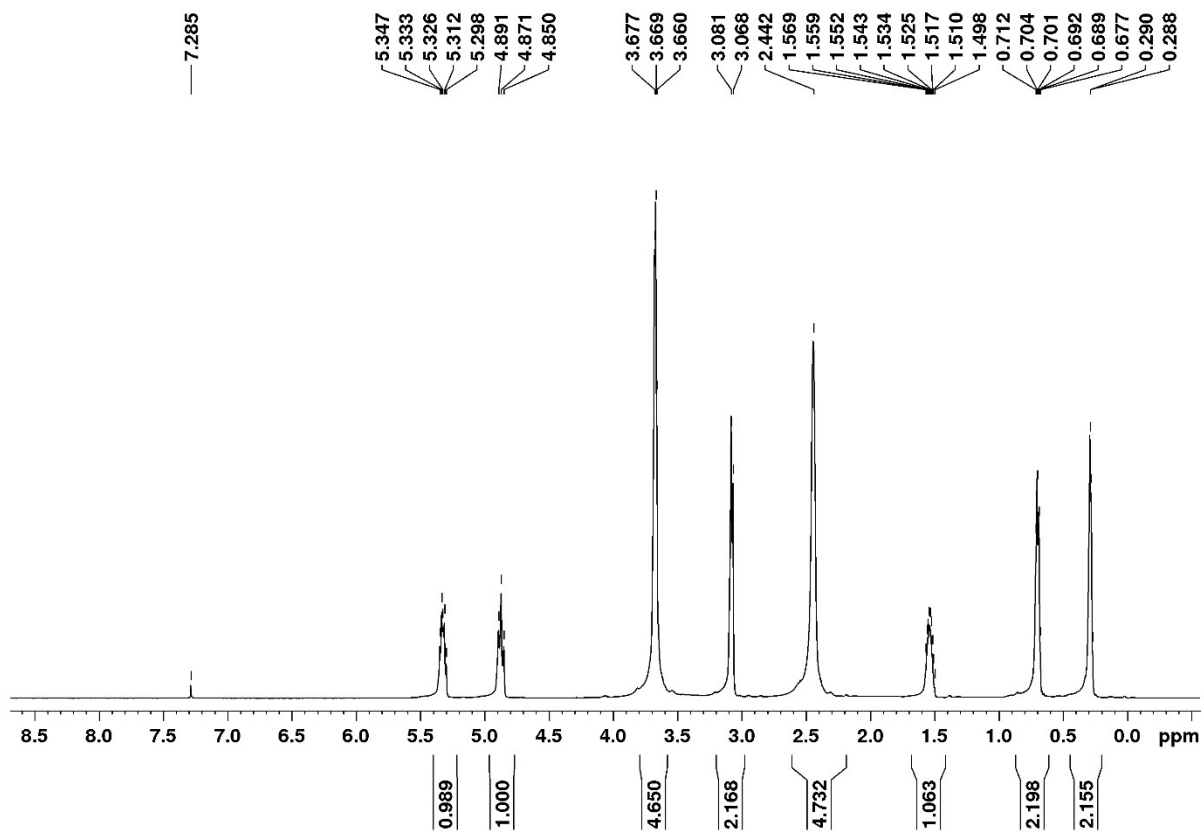

$^{13}\text{C-NMR}$  spectrum of (*Z*)-4-(3-cyclopropylallyl)morpholine (2g)

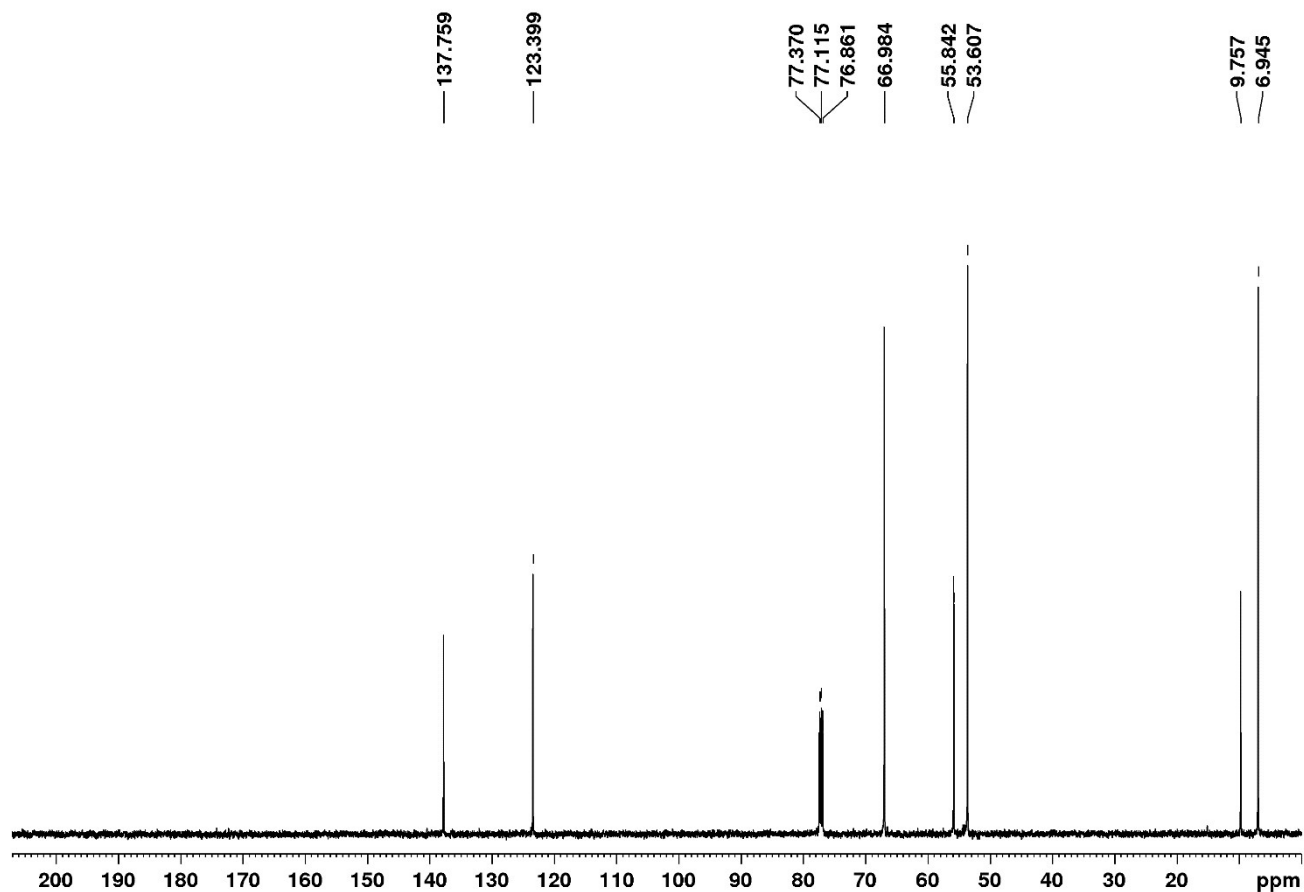

$^1\text{H-NMR}$  spectrum of (*Z*)-4-(hept-2-en-1-yl-2,3- $d_2$ )morpholine (**3e**)

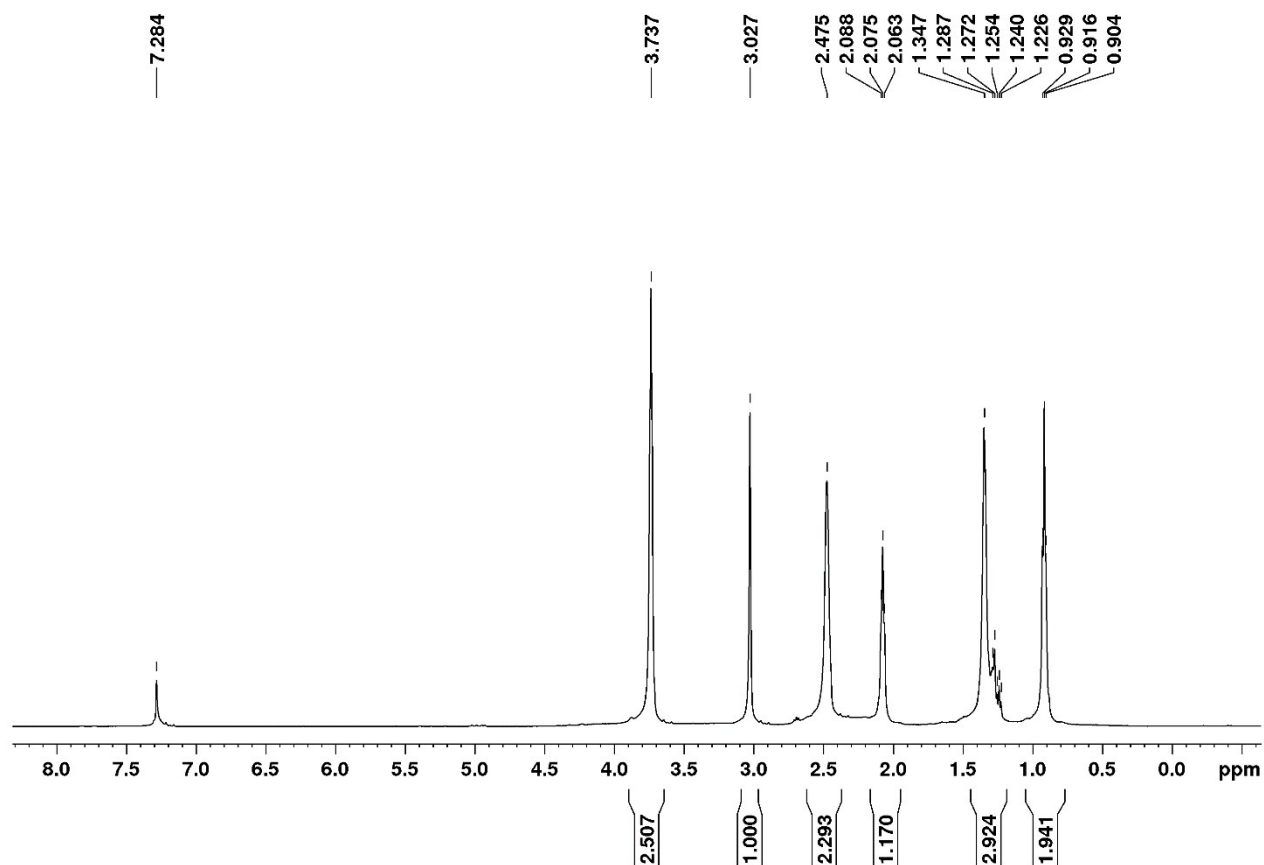

$^{13}\text{C-NMR}$  spectrum of (*Z*)-4-(hept-2-en-1-yl-2,3- $d_2$ )morpholine (**3e**)

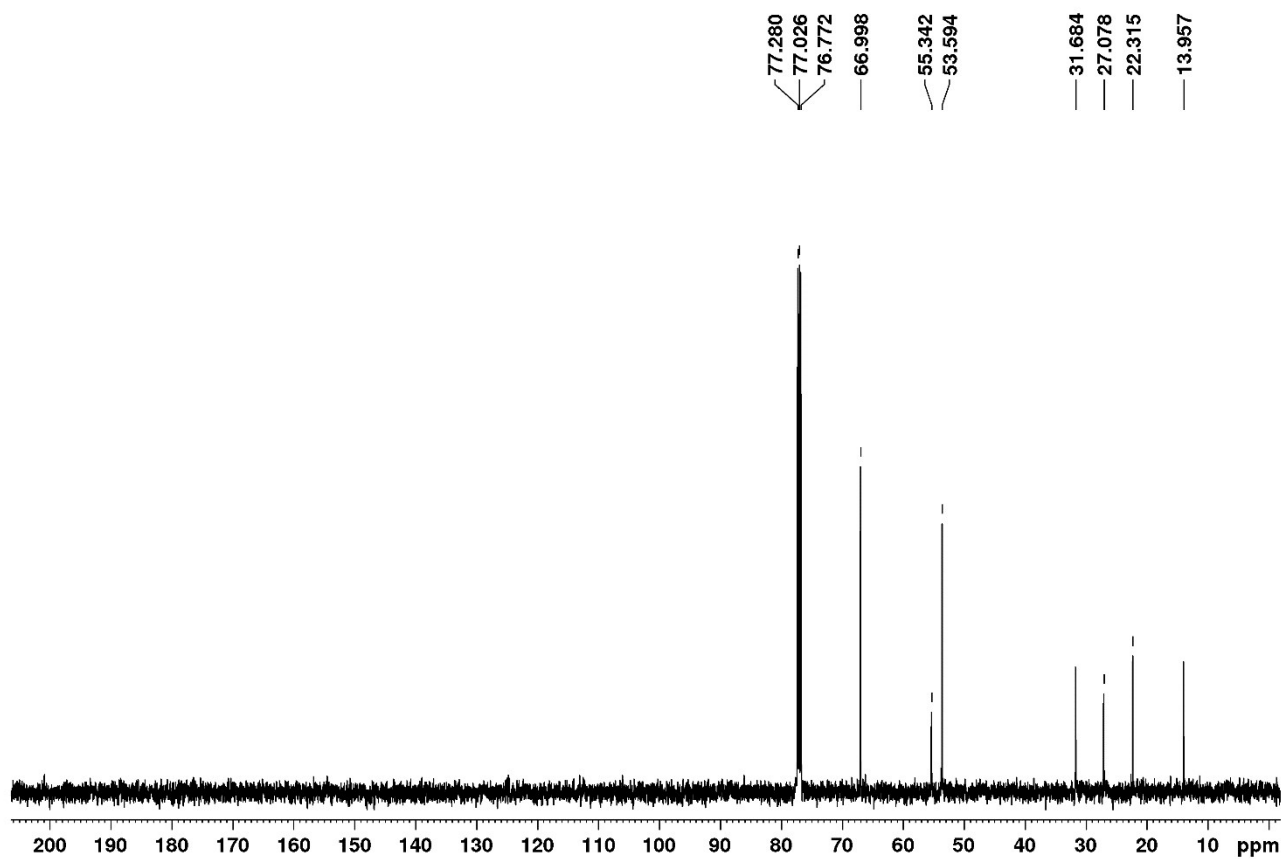

Supplement: d0ra10132j1.pdf [file d0ra10132j1.pdf]
